# Supplementary material for: Synthetic studies on palmerolide C: synthesis of an advanced intermediate towards the revised structure of palmerolide C
Source: Royal Society of Chemistry journal article supplement (doi:10.1039/d0ob01140a), 2020-01-01

Electronic Supplementary Material (ESI) for Organic & Biomolecular Chemistry.  
This journal is © The Royal Society of Chemistry 2020

### Electronic Supplementary Information

#### **"Synthetic Studies on Palmerolide C: Synthesis of the Advanced Intermediate Towards Revised Structure of Palmerolide C"**

Ashik A. Sayyad, Khushboo Kaim and Krishna P. Kaliappan\*

<sup>a</sup>Department of Chemistry, Indian Institute of Technology Bombay, Mumbai, 400 076, India.

\*E-mail: [kpk@chem.iitb.ac.in](mailto:kpk@chem.iitb.ac.in)

## **Copies of $^1\text{H}$ and $^{13}\text{C}$ NMR Spectra**

**(R)-1-((4R,5S)-5-(benzyloxymethyl)-2,2-dimethyl-1,3-dioxolan-4-yl)-5-(tert-butyldimethylsilyloxy)pent-3-yn-1-ol (13)**

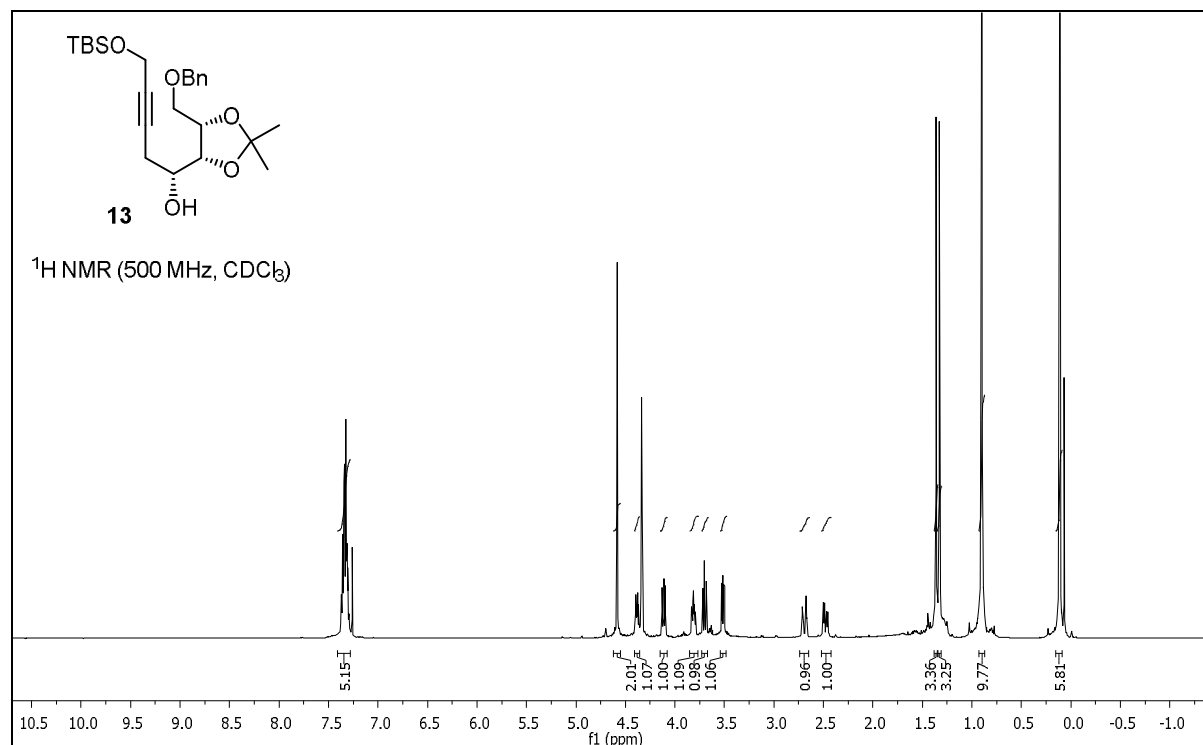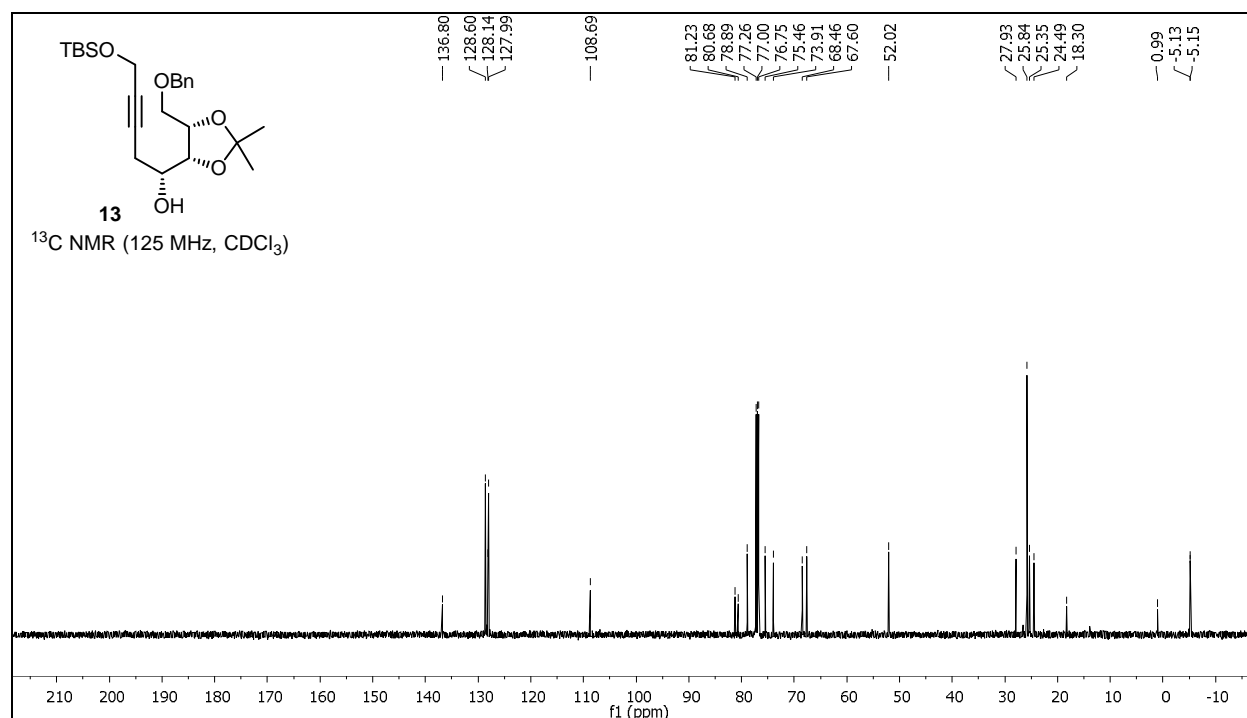

**(R)-1-((4R,5S)-5-(benzyloxymethyl)-2,2-dimethyl-1,3-dioxolan-4-yl)-5-(tert-butyldimethylsilyloxy)pentan-1-ol (14)**

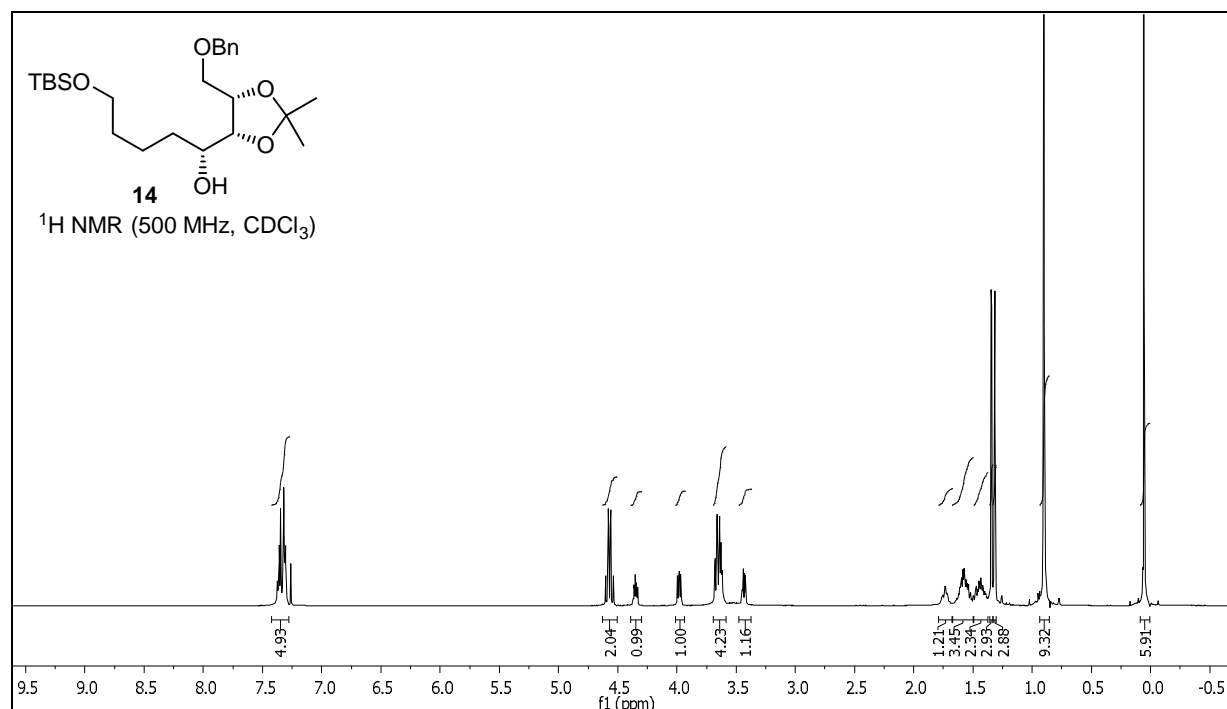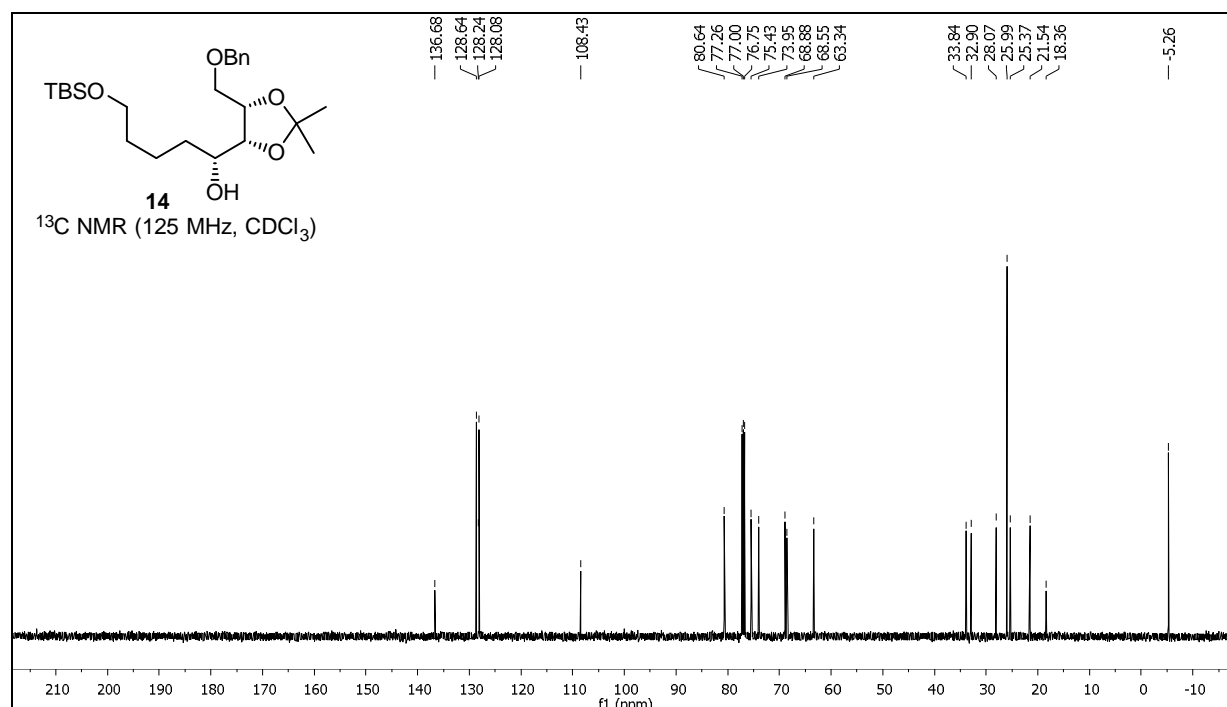

**(R)-5-((4S,5S)-5-(benzyloxymethyl)-2,2-dimethyl-1,3-dioxolan-4-yl)-2,2,3,3,11,11,12,12-octamethyl-4,10-dioxo-3,11-disilatridecane (15)**

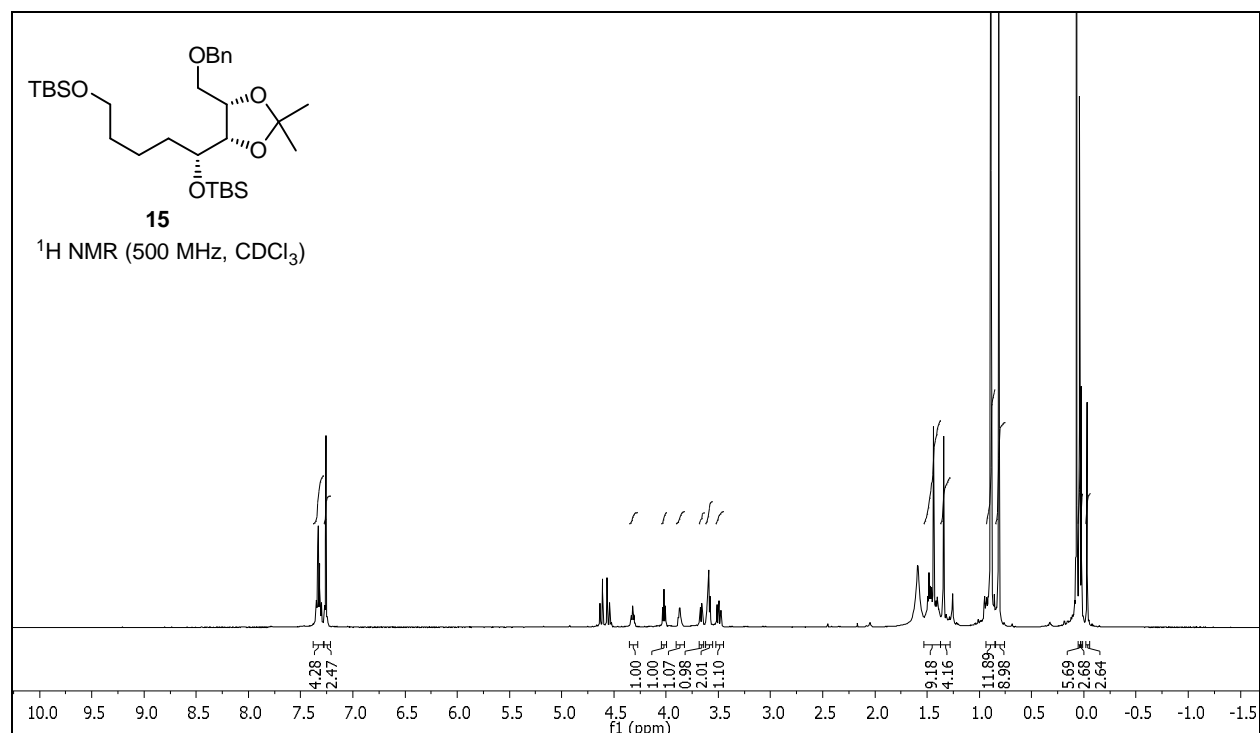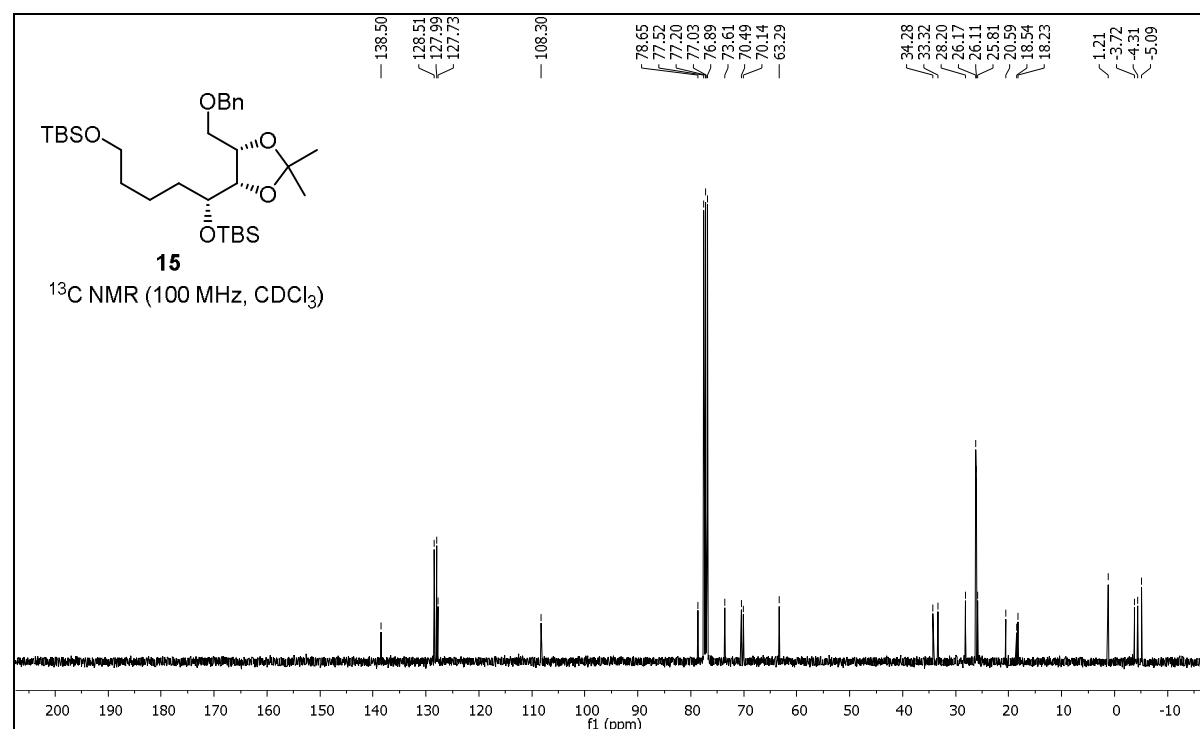

((4*S*,5*S*)-2,2-dimethyl-5-((*R*)-2,2,3,3,11,11,12,12-octamethyl-4,10-dioxo-3,11-disilatridecan-5-yl)-1,3-dioxolan-4-yl)methanol (**16**)

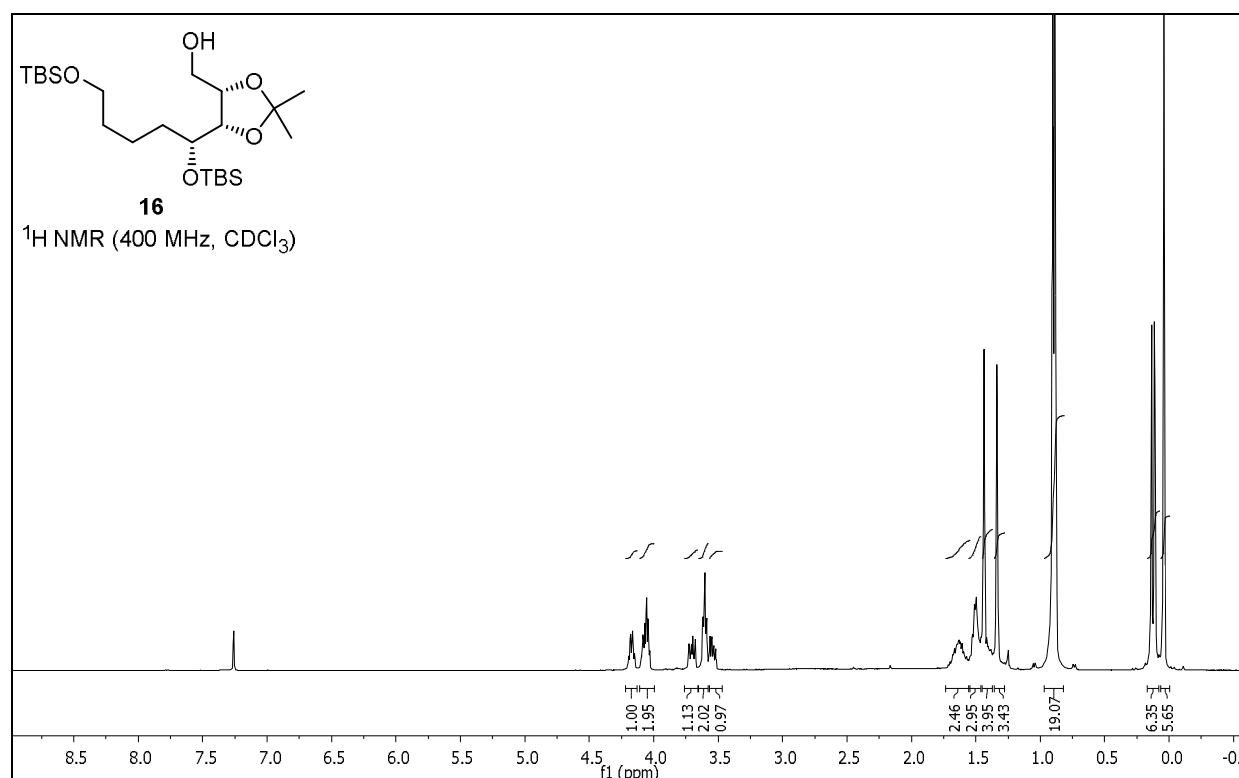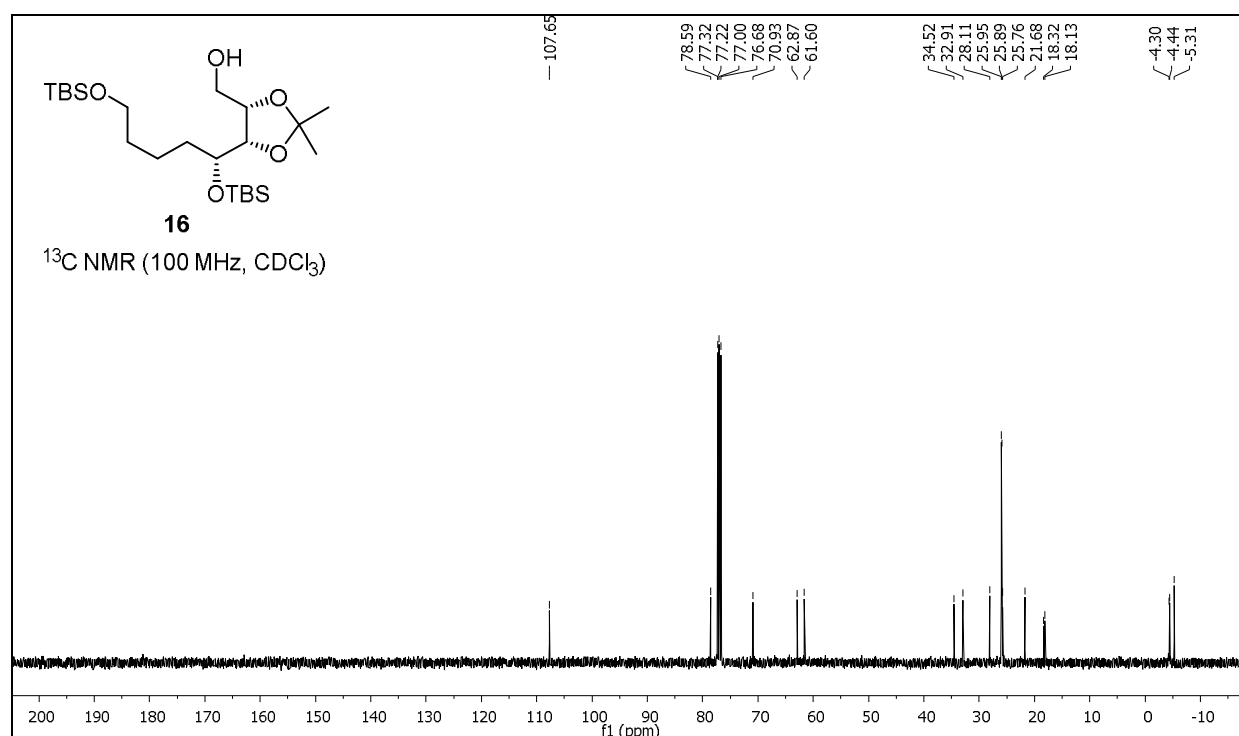

(*R*)-5-((4*S*,5*S*)-2,2-dimethyl-5-vinyl-1,3-dioxolan-4-yl)-2,2,3,3,11,11,12,12-octamethyl-4,10-dioxo-3,11-disilatridecane (**18**)

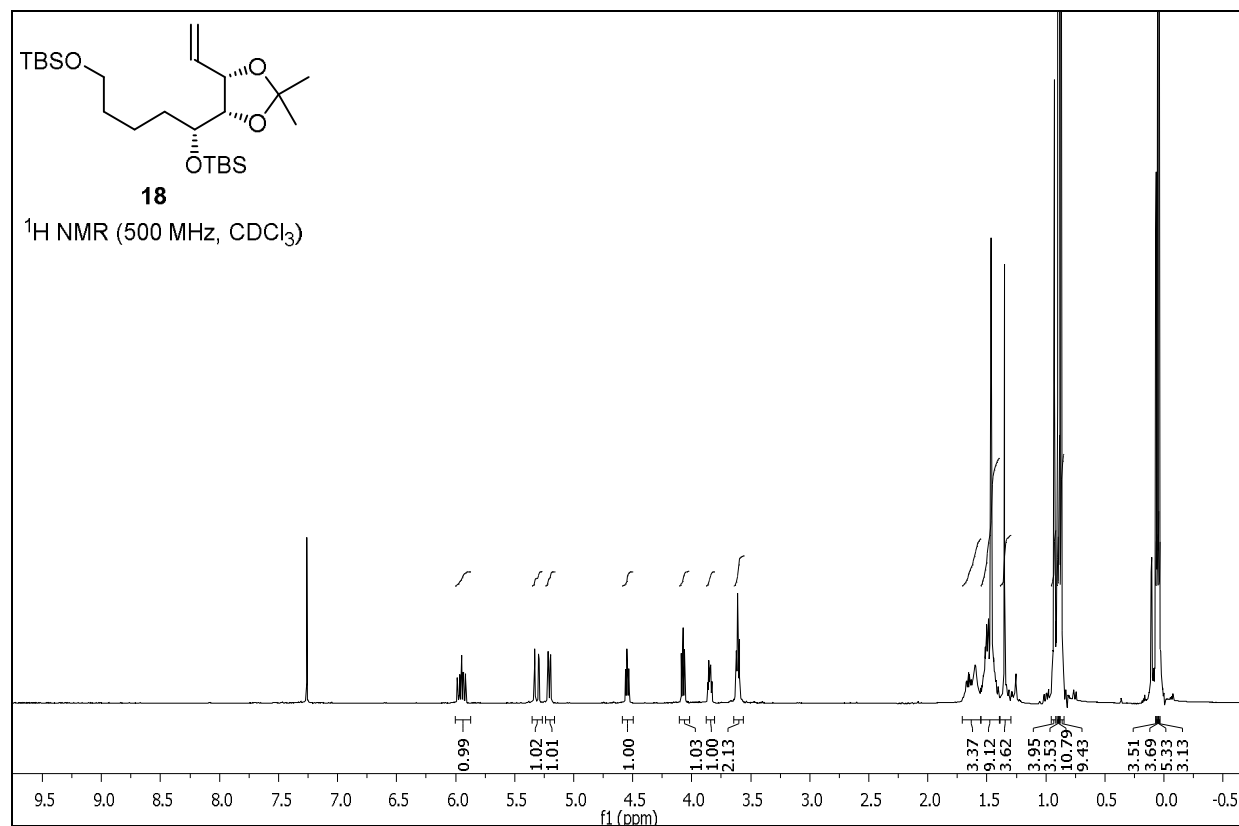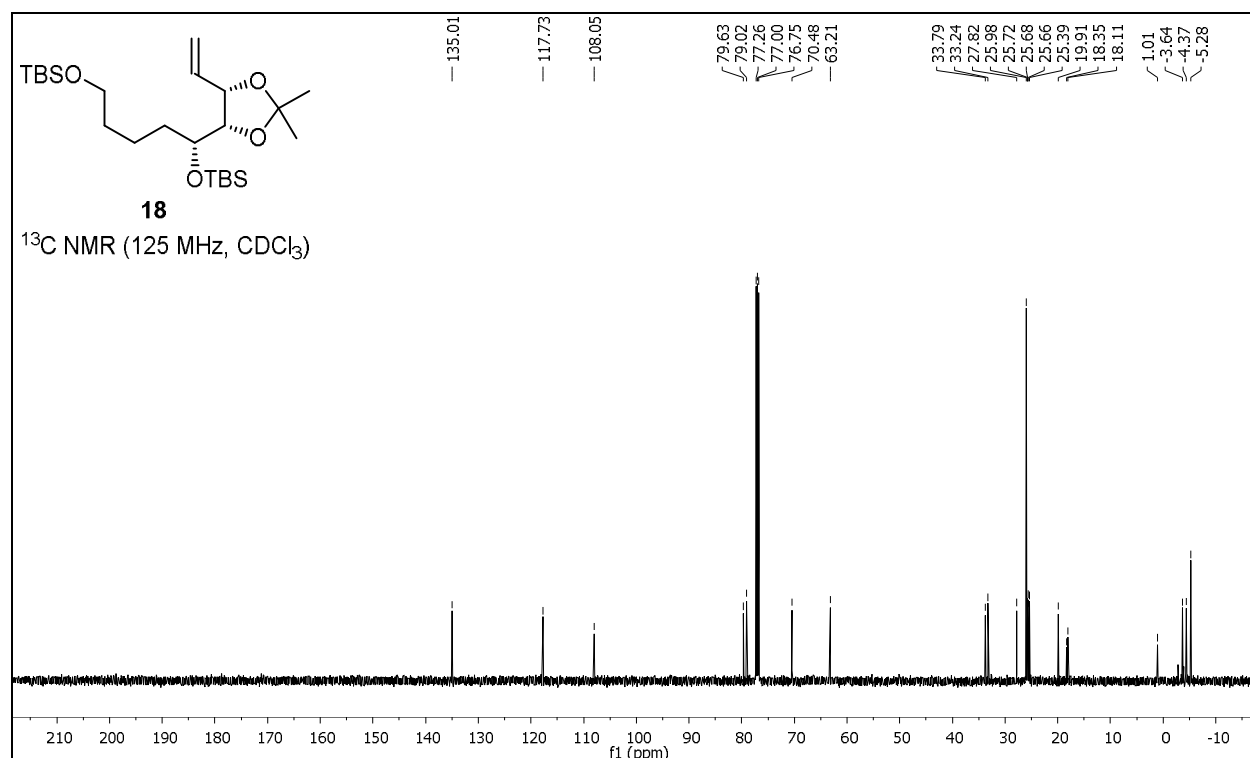

**(R)-5-(tert-butyldimethylsilyloxy)-5-((4S,5S)-2,2-dimethyl-5-vinyl-1,3-dioxolan-4-yl)pentan-1-ol (19)**

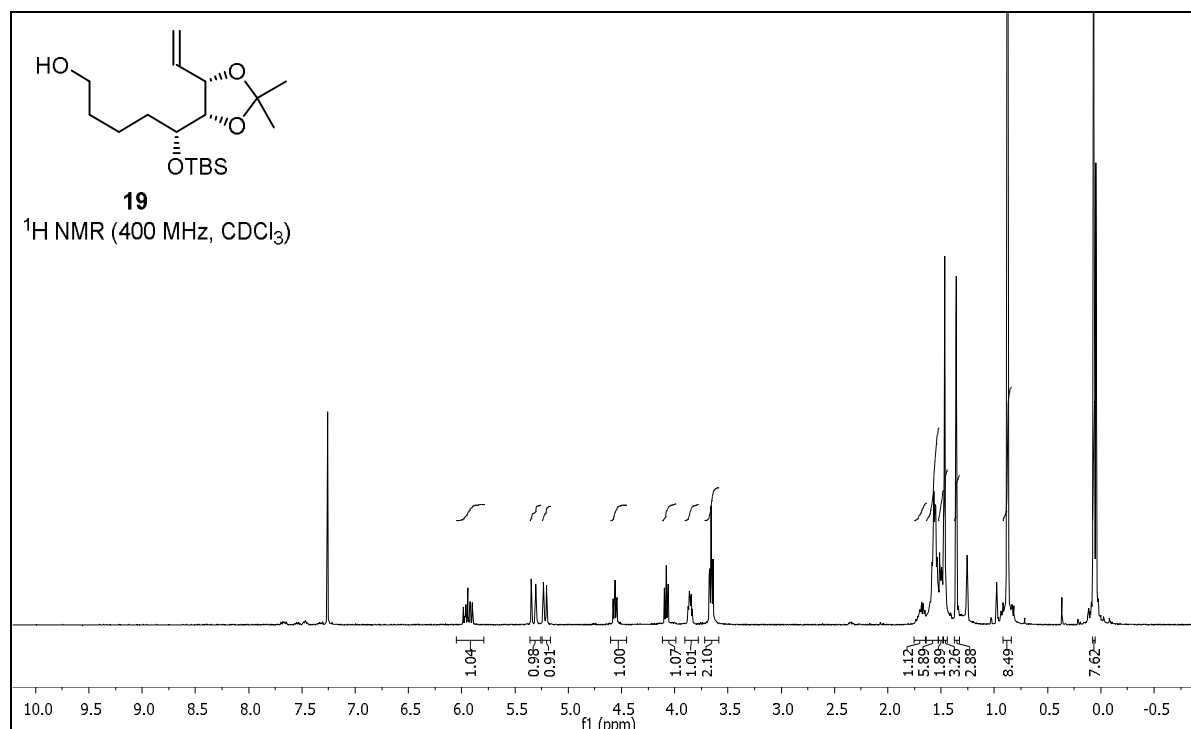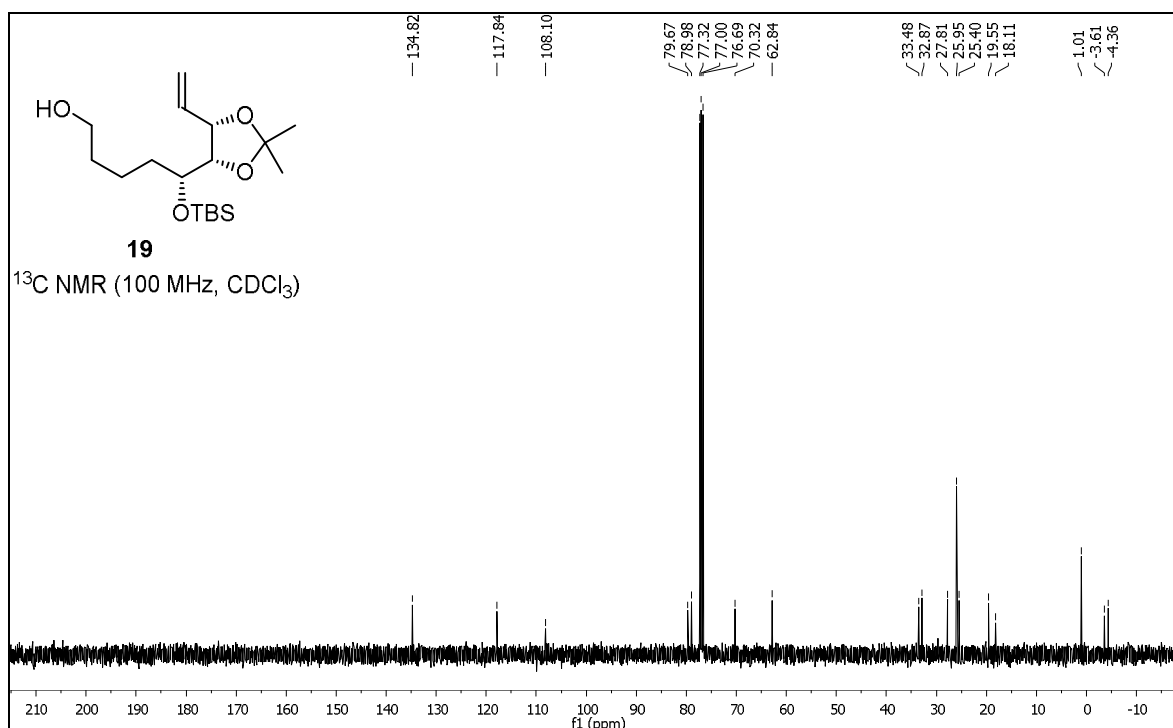



5-((*R*)-5-(tert-butyldimethylsilyloxy)-5-((4*S*,5*S*)-2,2-dimethyl-5-vinyl-1,3-dioxolan-4-yl)pentylthio)-1-phenyl-1H-tetrazole  
(20)

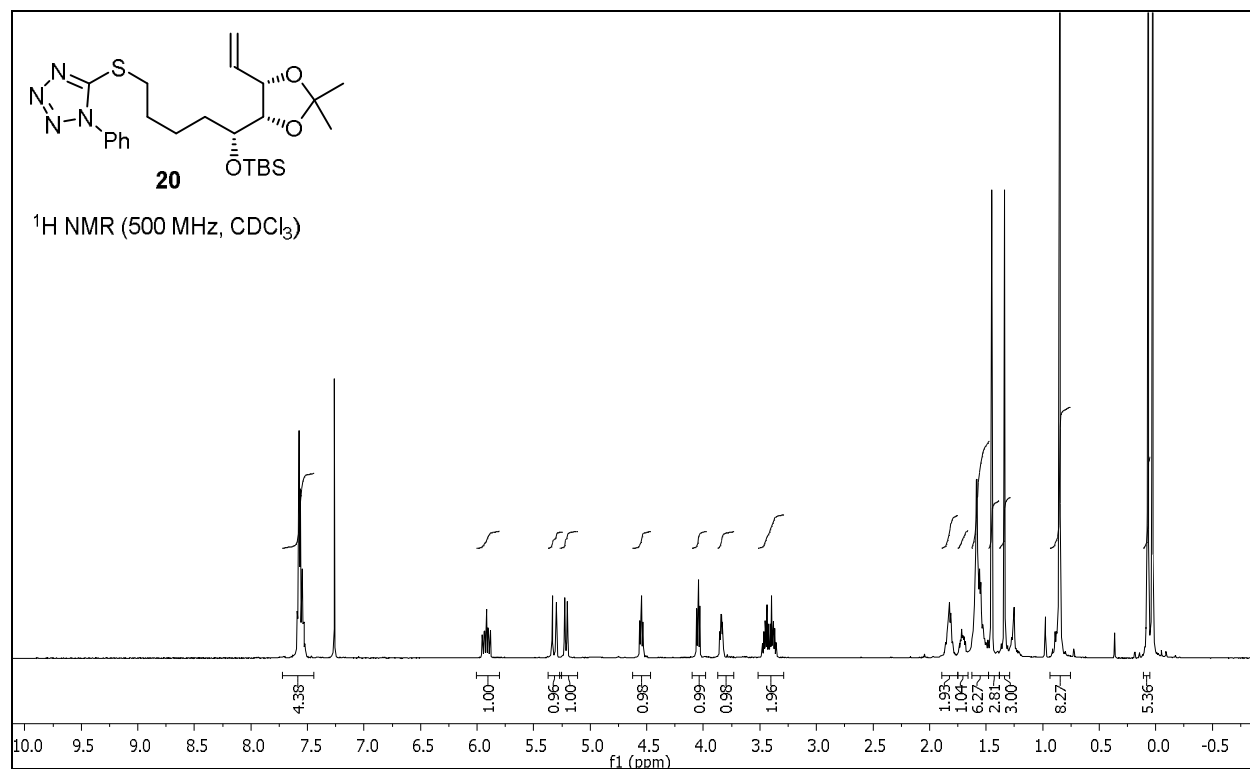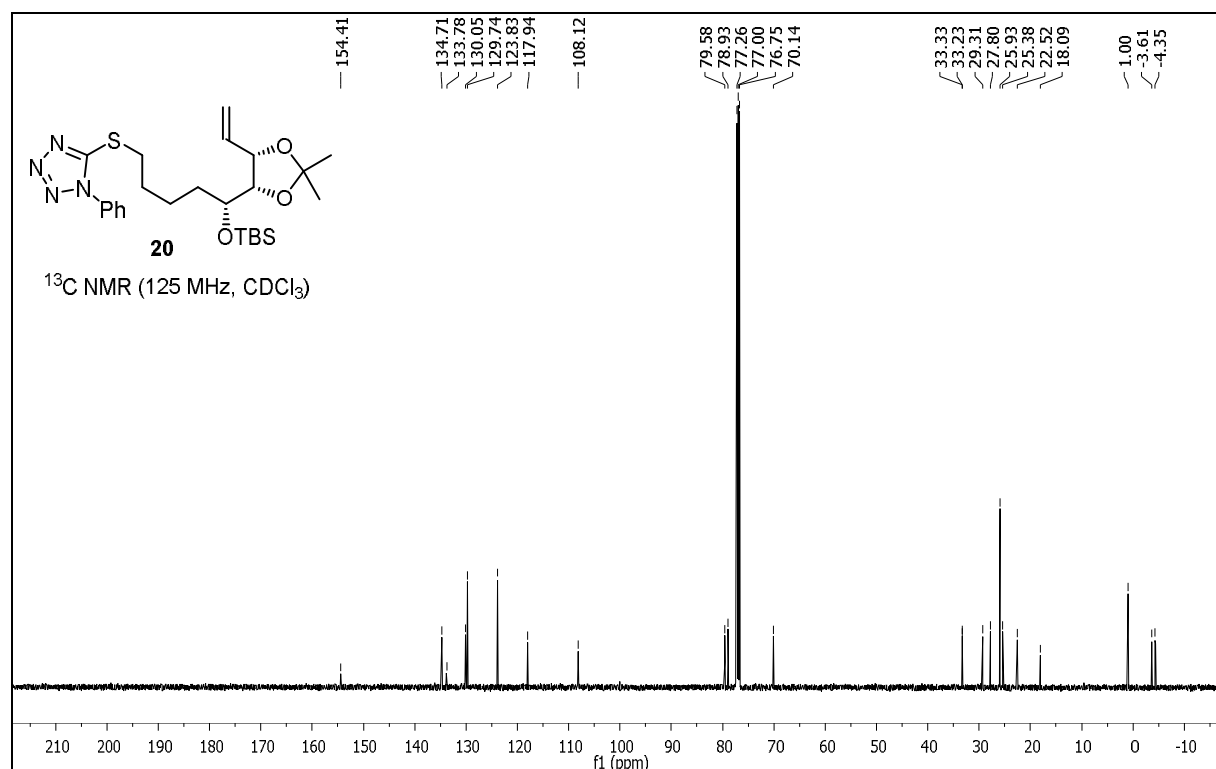

5-((*R*)-5-(tert-butyldimethylsilyloxy)-5-((4*S*,5*S*)-2,2-dimethyl-5-vinyl-1,3-dioxolan-4-yl)pentylsulfonyl)-1-phenyl-1H-tetrazole (**7a**)

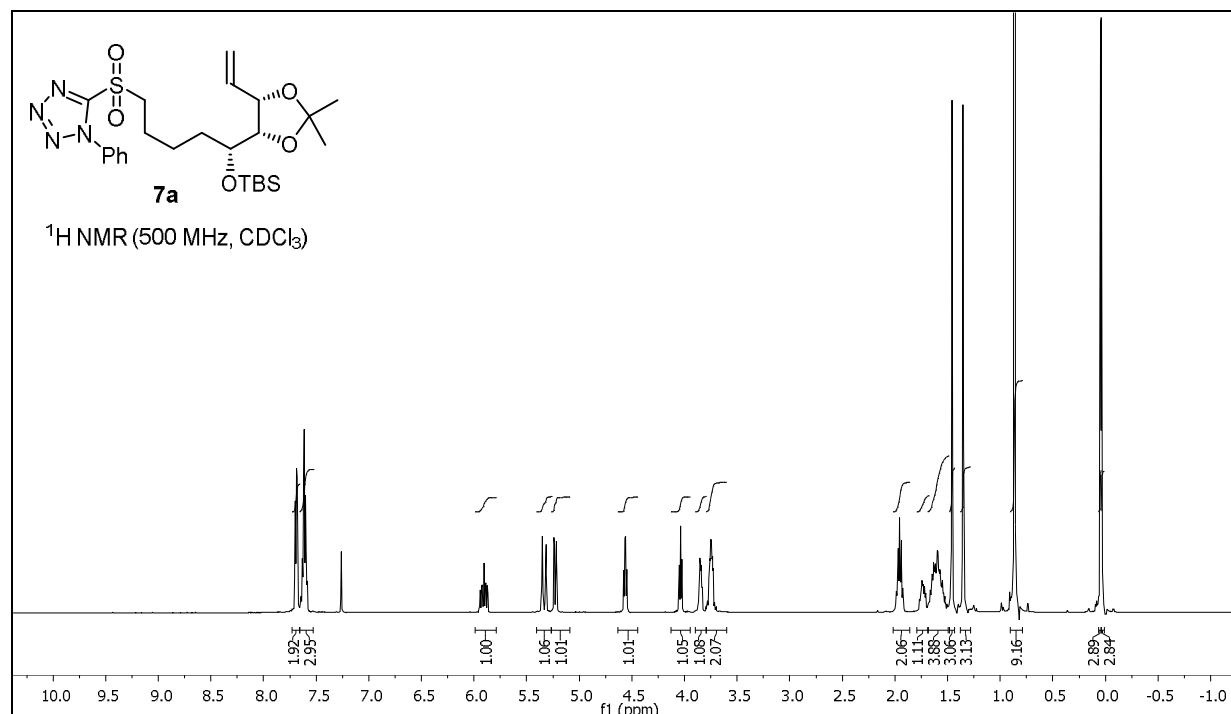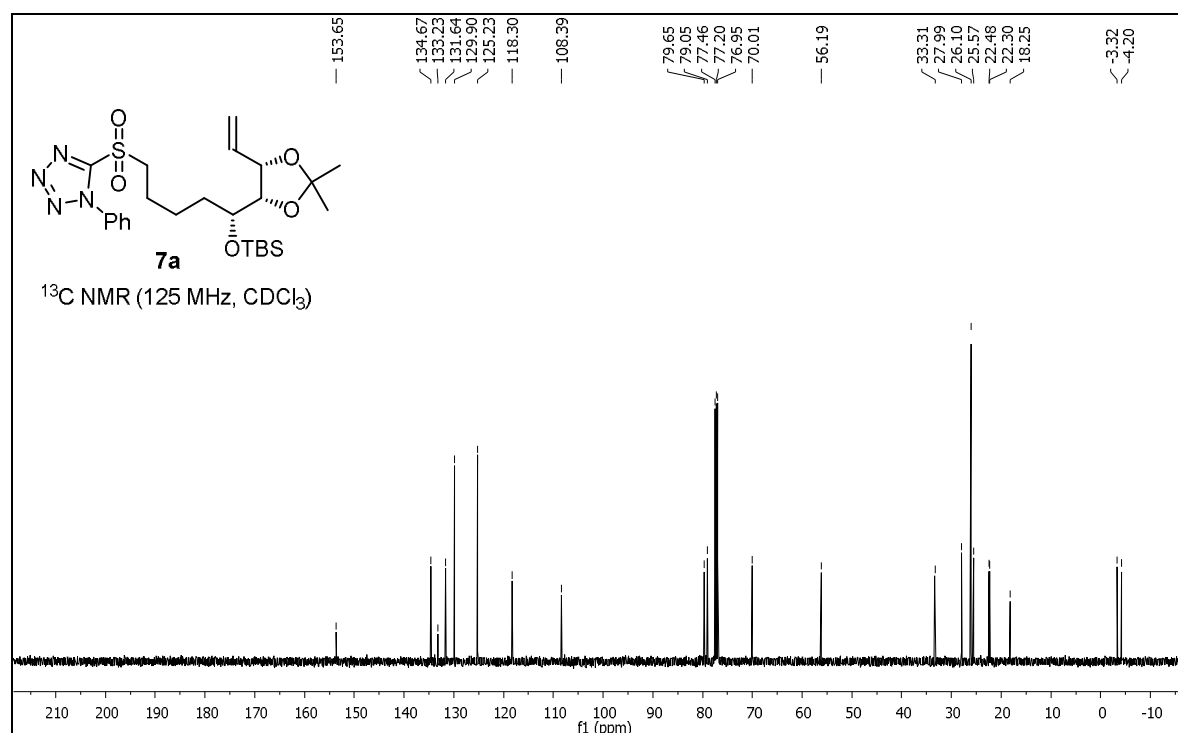

*tert*-butyl((*S*)-1-((4*S*,5*S*)-2,2-dimethyl-5-vinyl-1,3-dioxolan-4-yl)-5-(4-methoxy benzyloxy)pentyloxy)dimethylsilane (**23a**)

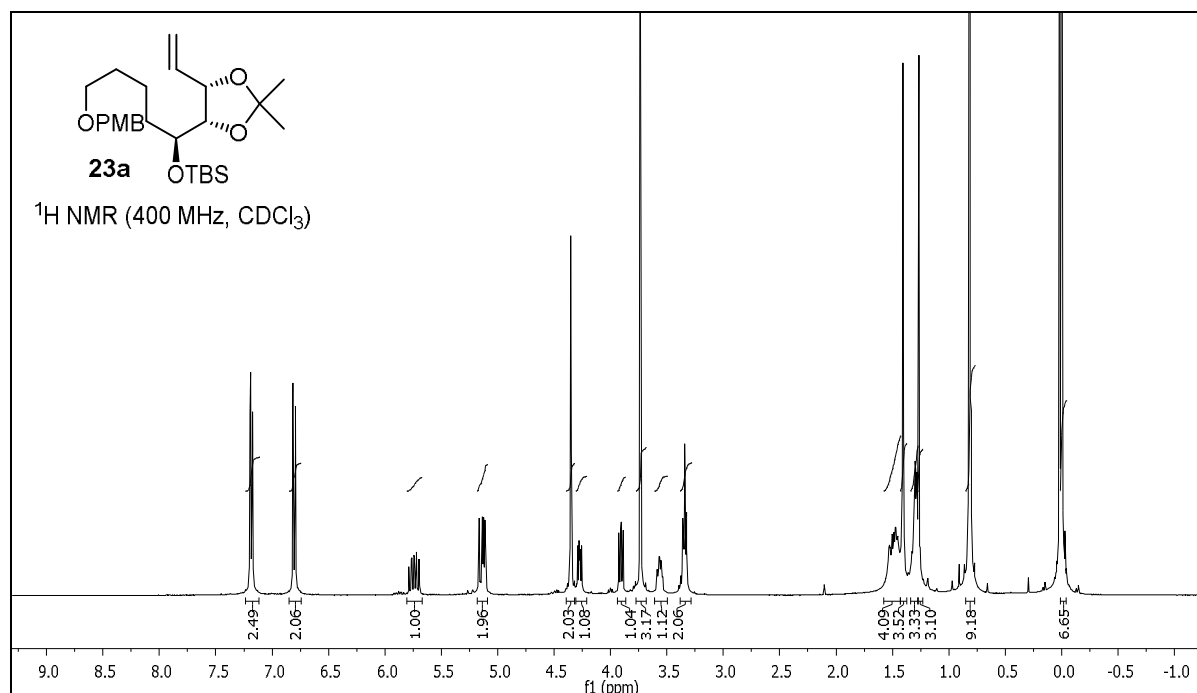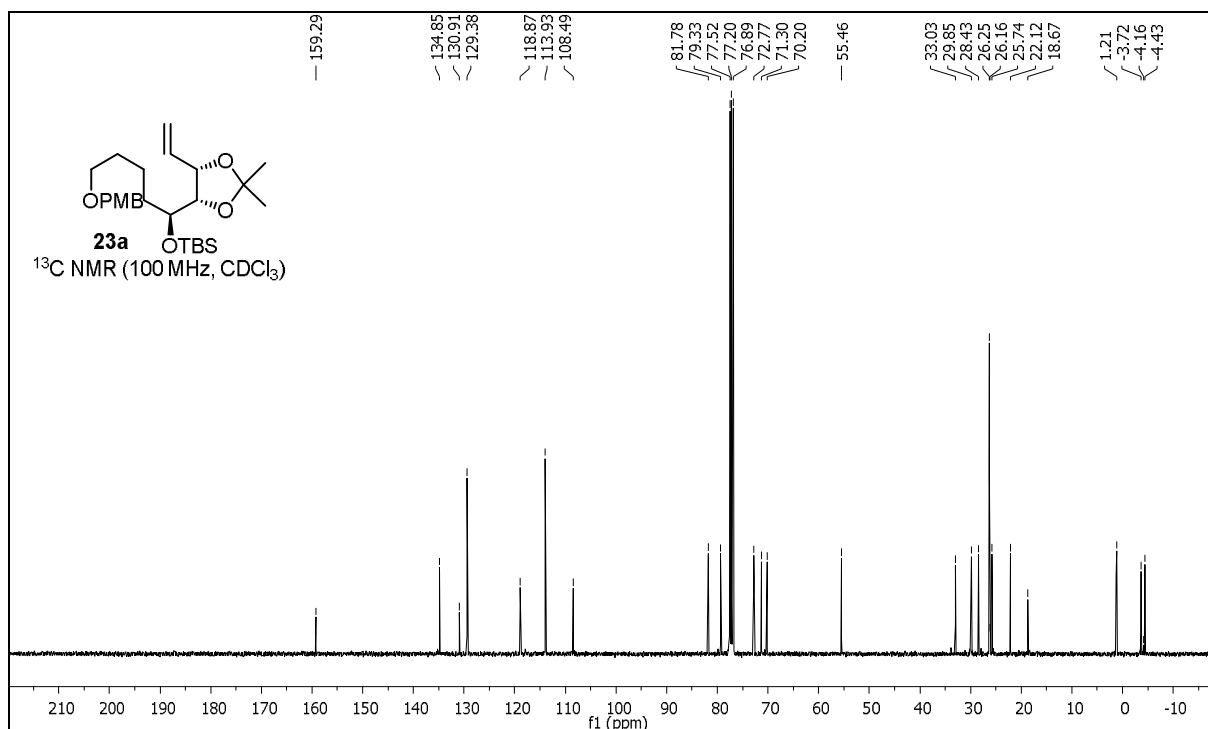

(5S)-5-(tert-butyldimethylsilyloxy)-5-((4S,5S)-2-methyl-5-vinyl-1,3-dioxolan-4-yl)pentan-1-ol (**24**)

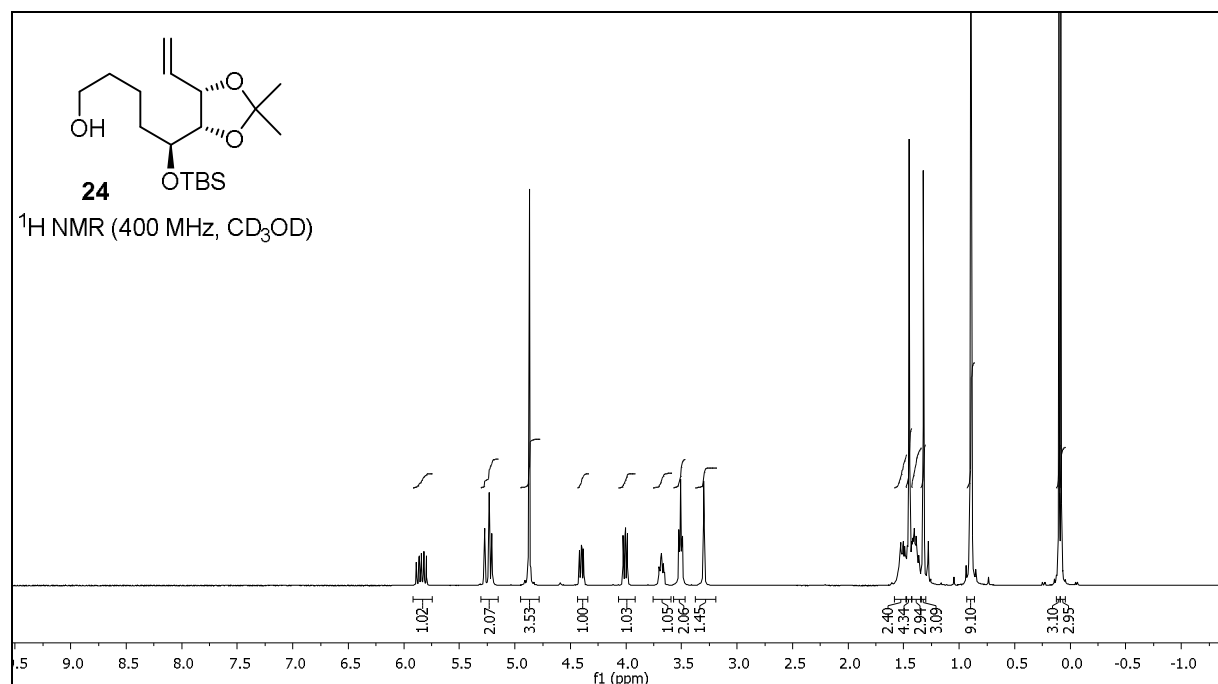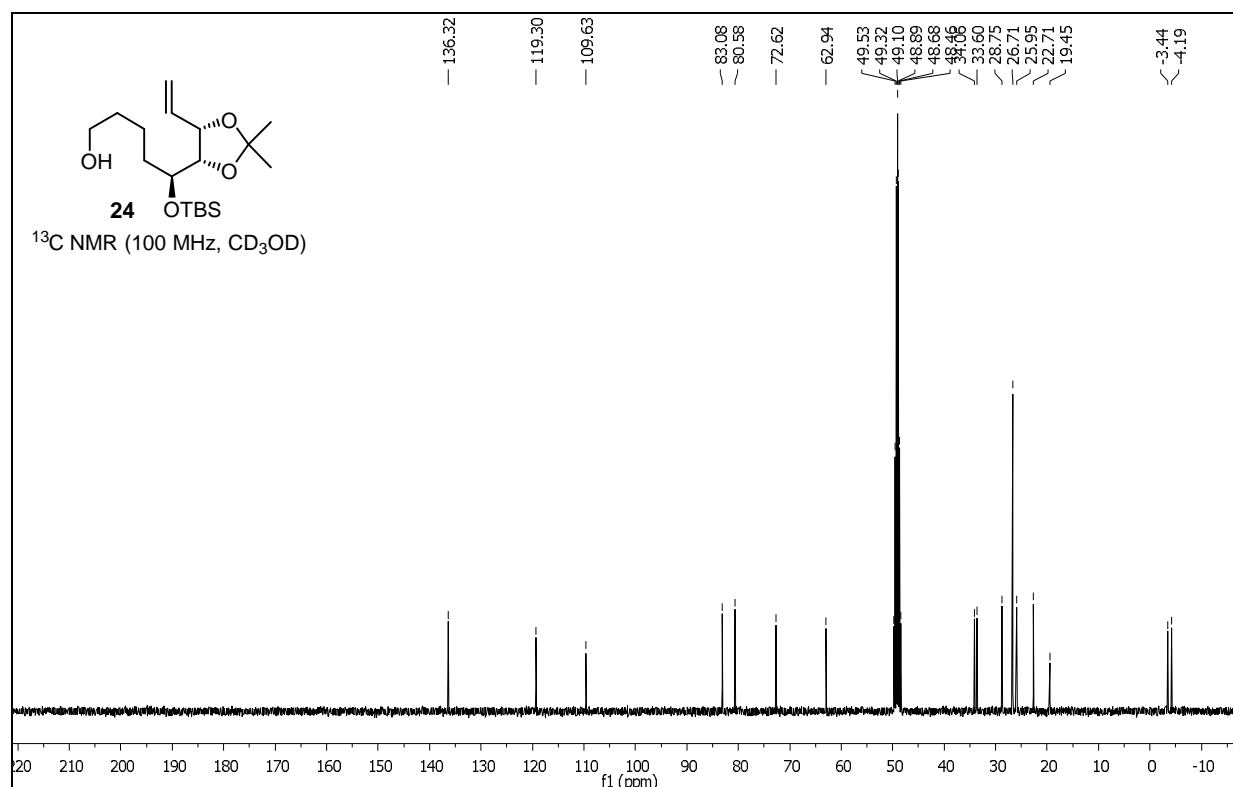

Comparison of  $^1\text{H}$  NMR of diastereomeric alcohols **19** and **24**

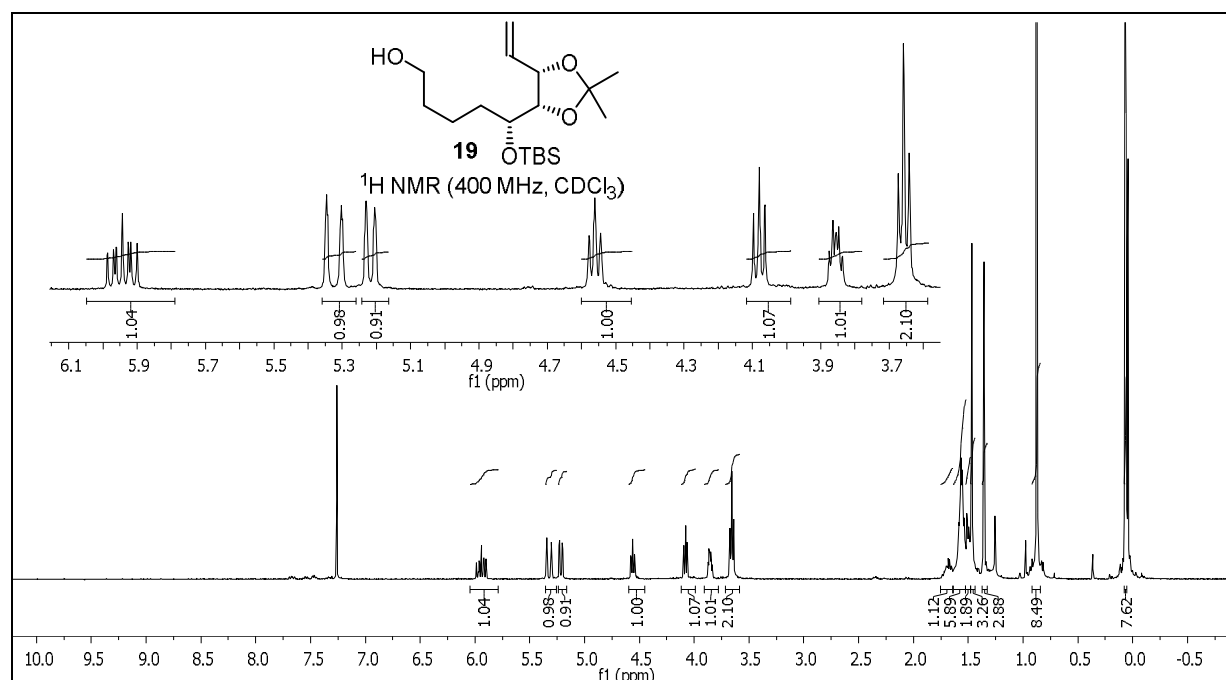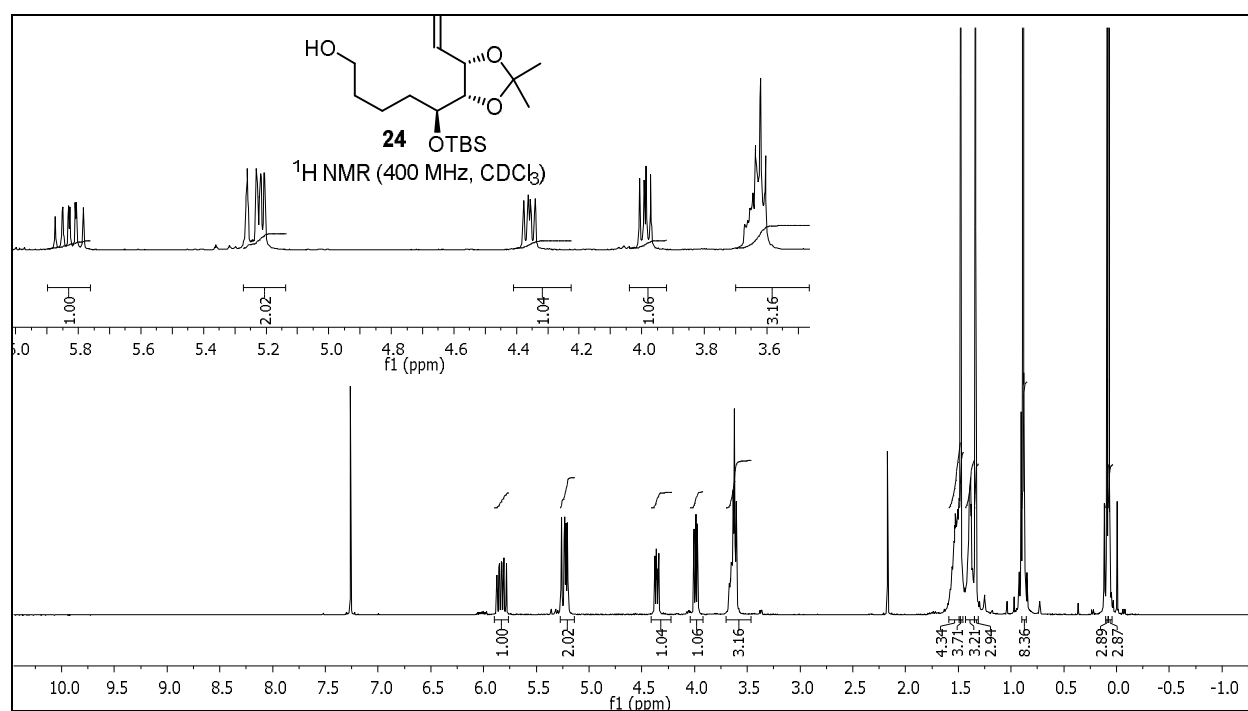

5-((*S*)-5-(*tert*-butyldimethylsilyloxy)-5-((4*S*,5*S*)-2,2-dimethyl-5-vinyl-1,3-dioxolan-4-yl)pentylthio)-1-phenyl-1*H*-tetrazole  
(25)

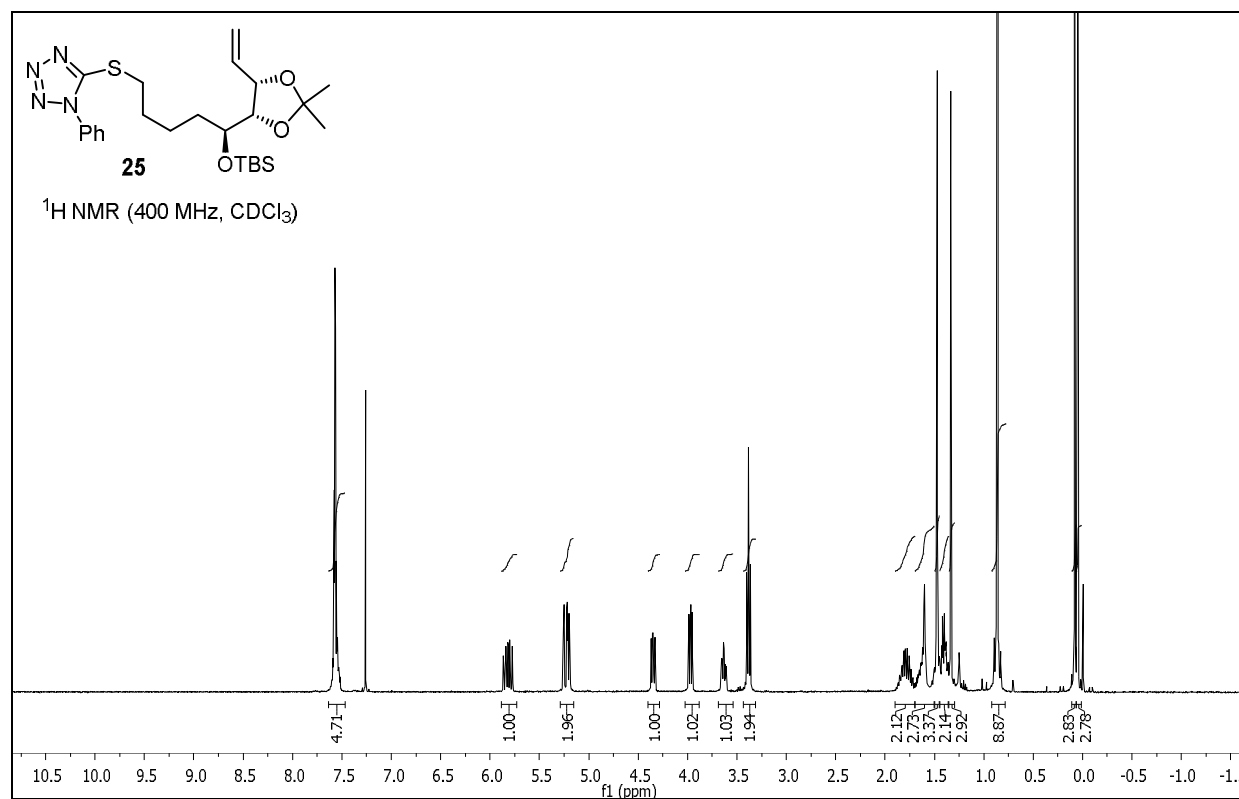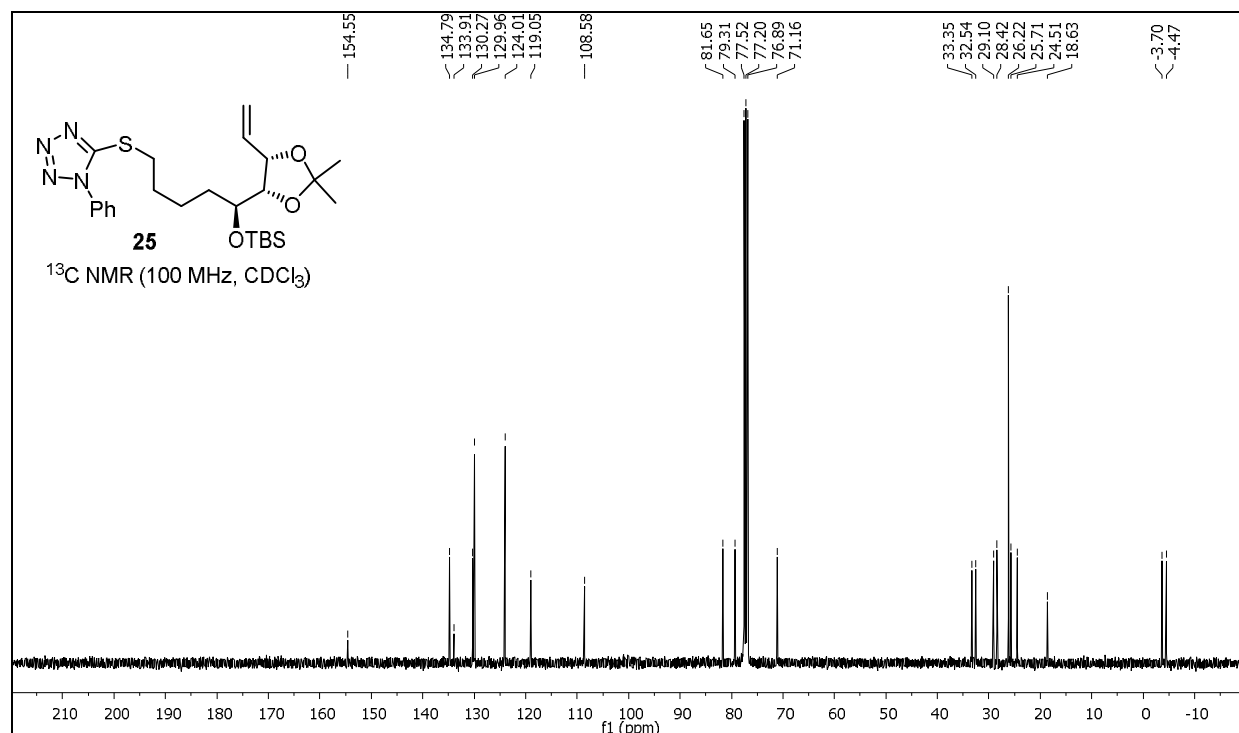

5-((*S*)-5-(*tert*-butyldimethylsilyloxy)-5-((4*S*,5*S*)-2,2-dimethyl-5-vinyl-1,3-dioxolan-4-yl)pentylsulfonyl)-1-phenyl-1H-tetrazole (**7b**)

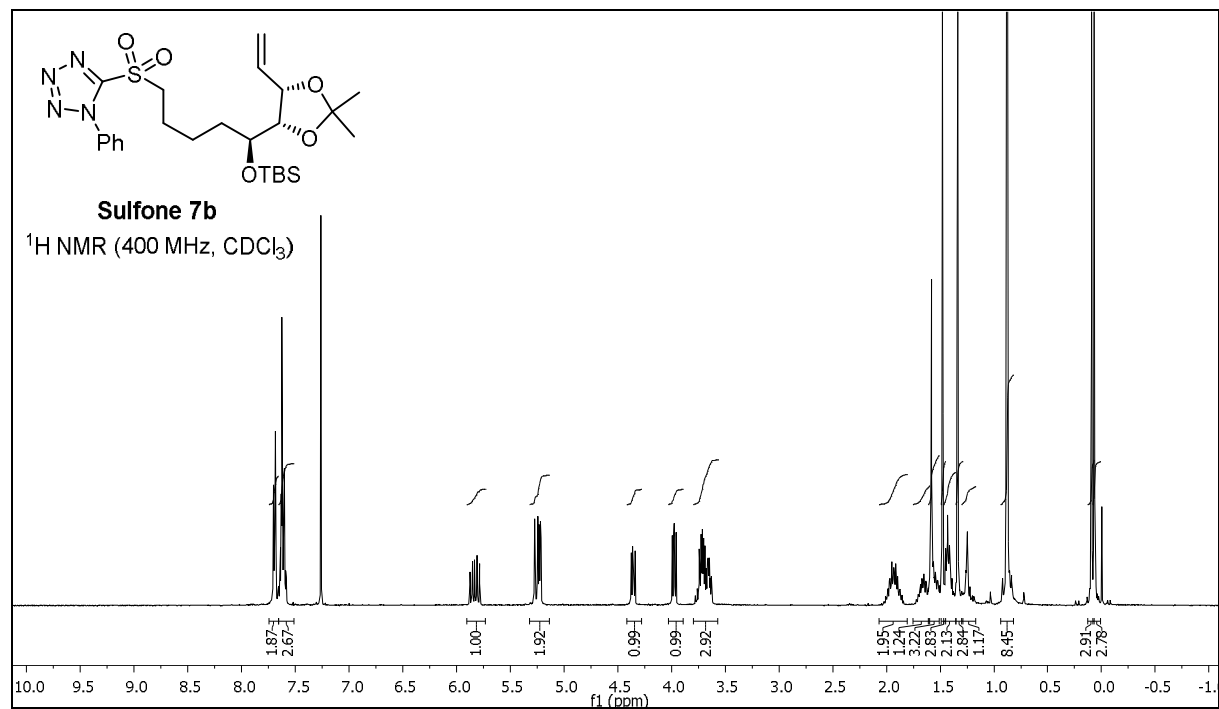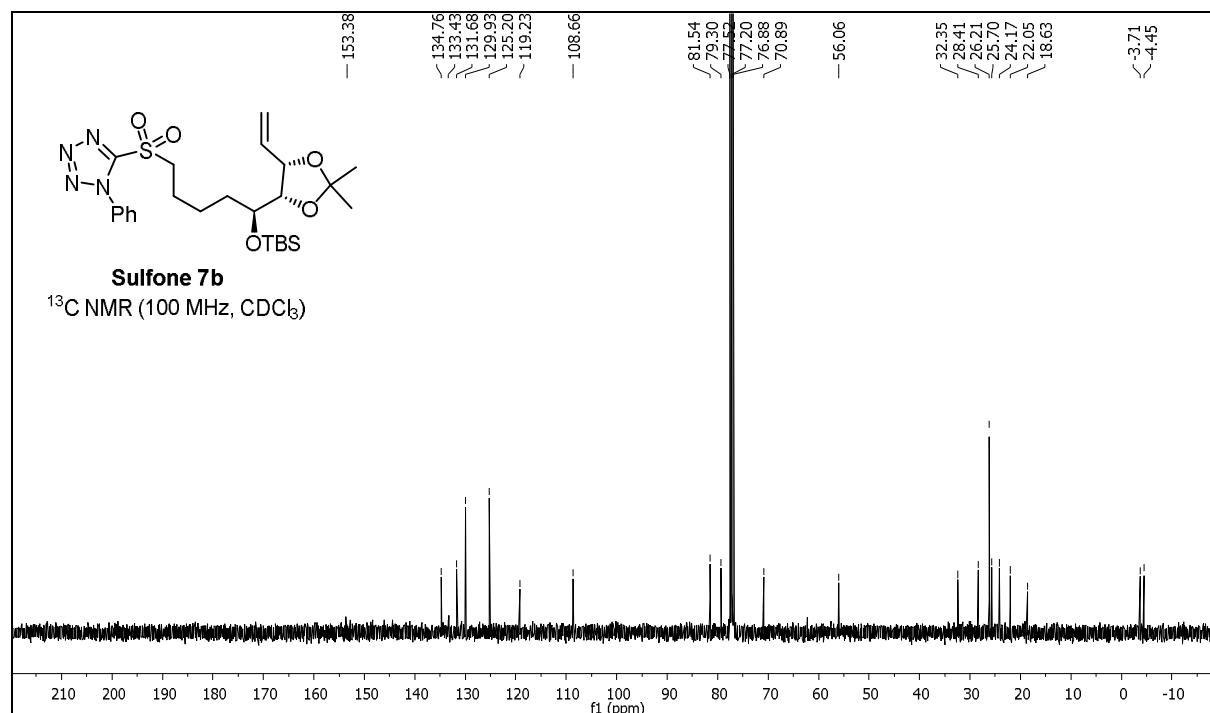

Comparison of  $^1\text{H}$  NMR of diastereomeric sulfones **7a** and **7b**

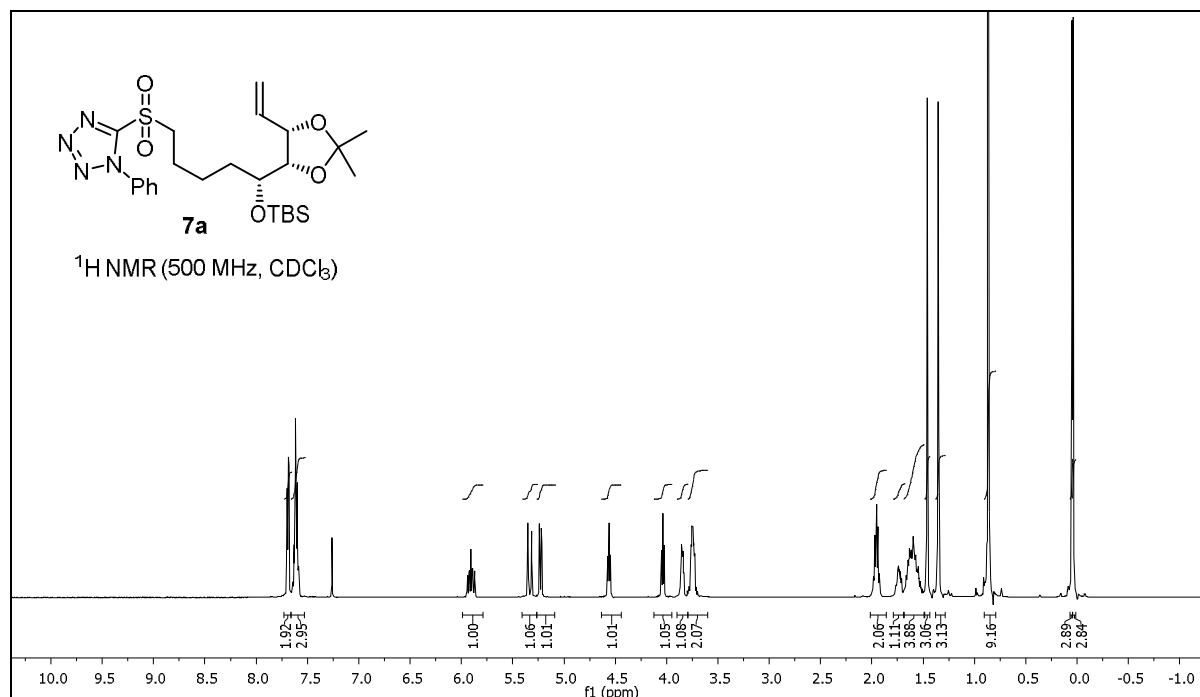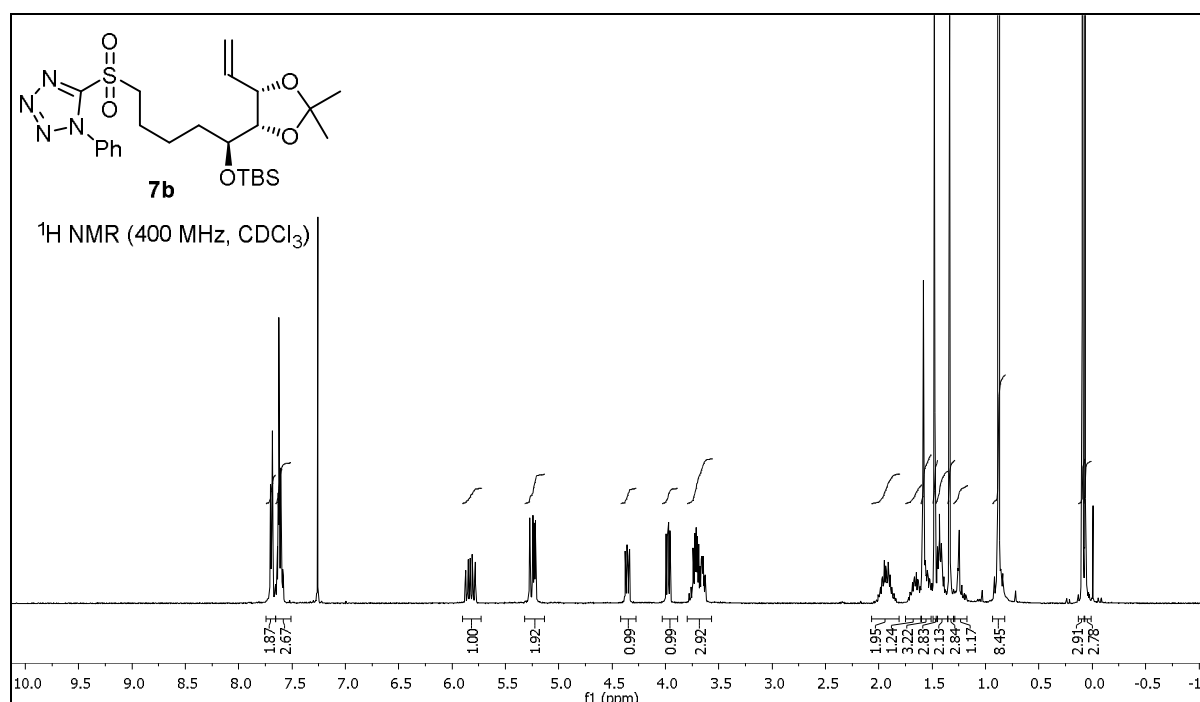



(6*E*,8*R*,9*R*,11*E*,13*E*,18*S*)-18-((4*S*,5*S*)-2,2-dimethyl-5-vinyl-1,3-dioxolan-4-yl)-2,2,6,8,11,20,20,21,21-nonamethyl-3,3-diphenyl-4,19-dioxo-3,20-disiladocosa-6,11,13-trien-9-yl acetate (26)

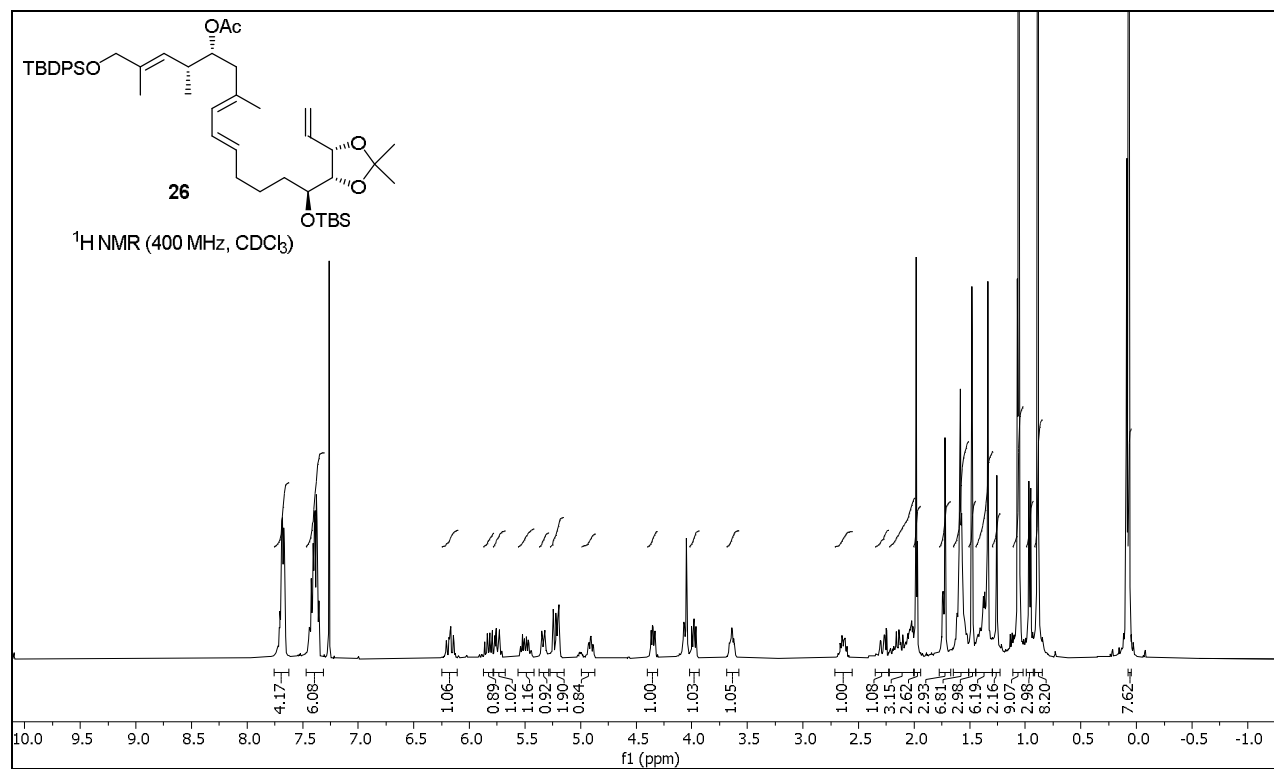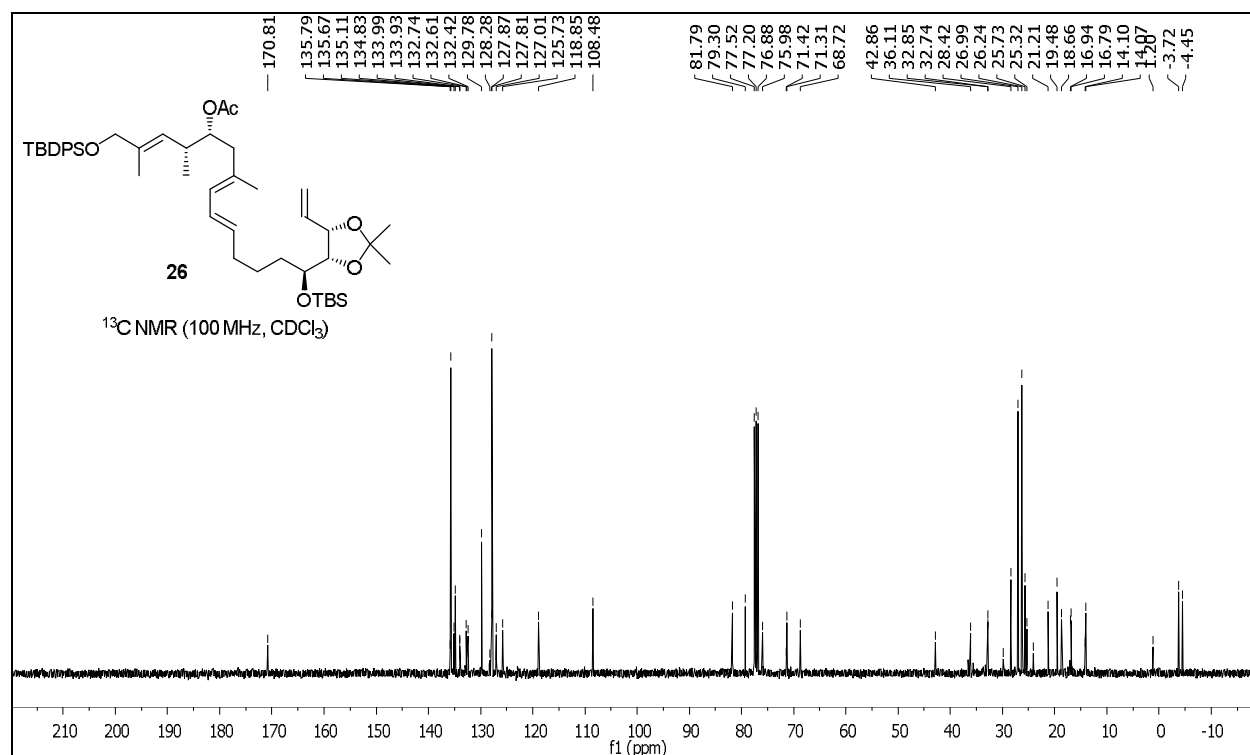

(2*E*,4*R*,5*R*,7*E*,9*E*,14*S*)-14-(tert-butyldimethylsilyloxy)-14-((4*S*,5*S*)-2,2-dimethyl-5-vinyl-1,3-dioxolan-4-yl)-1-hydroxy-2,4,7-trimethyltetradeca-2,7,9-trien-5-yl acetate (27)

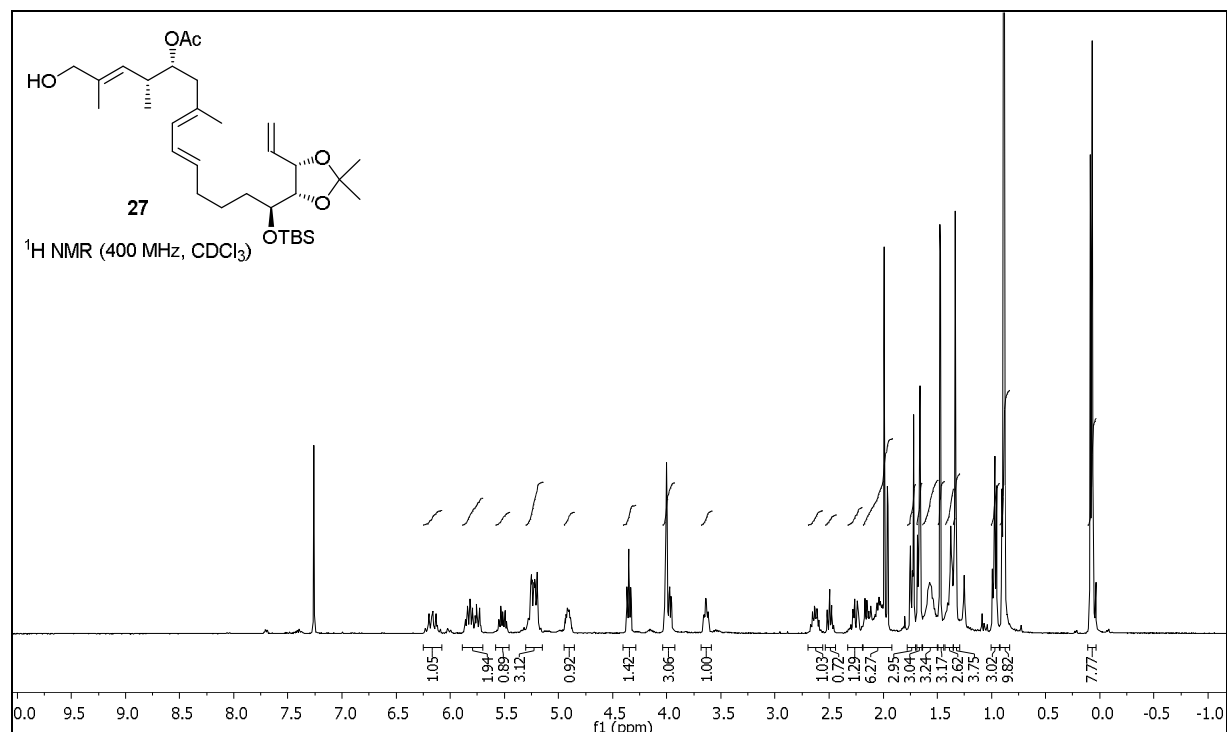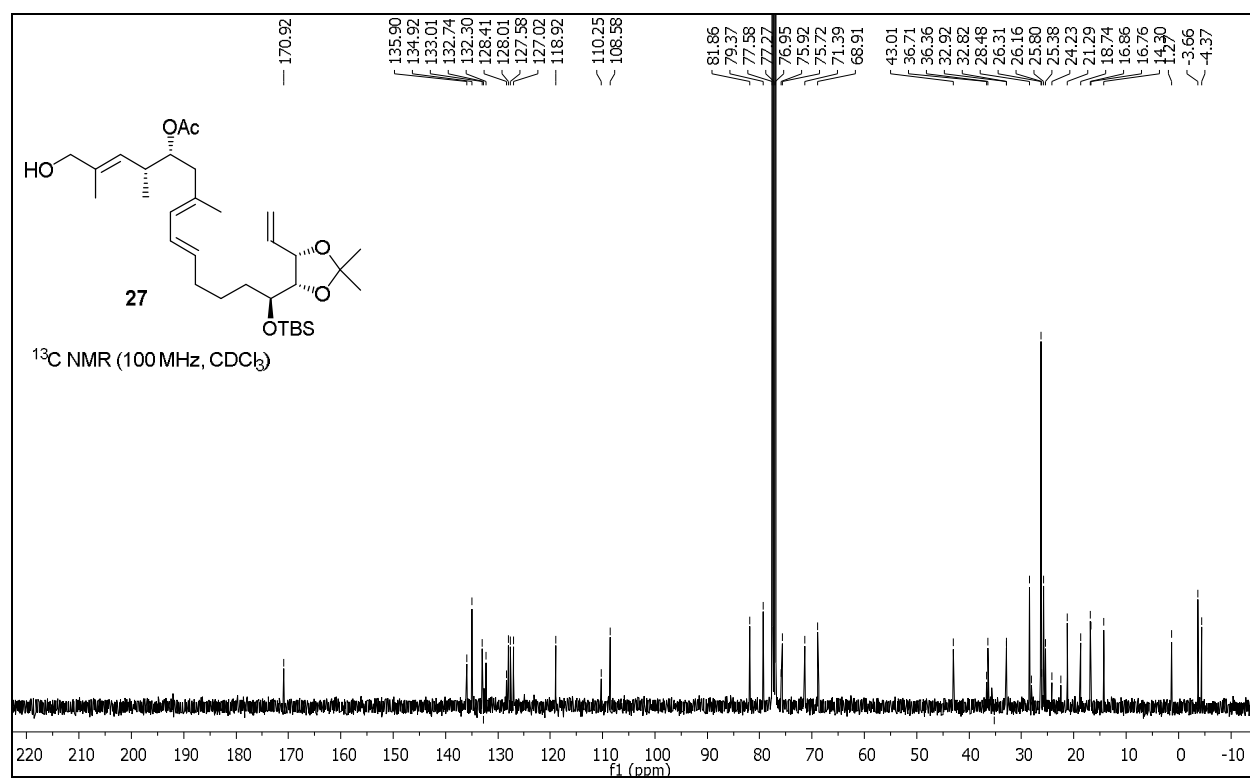

(1*E*,3*E*,5*R*,6*R*,8*E*,10*E*,15*S*)-15-(tert-butyl dimethylsilyloxy)-15-((4*S*,5*S*)-2,2-dimethyl-5-vinyl-1,3-dioxolan-4-yl)-1-iodo-3,5,8-trimethylpentadeca-1,3,8,10-tetraen-6-ol (**28**)

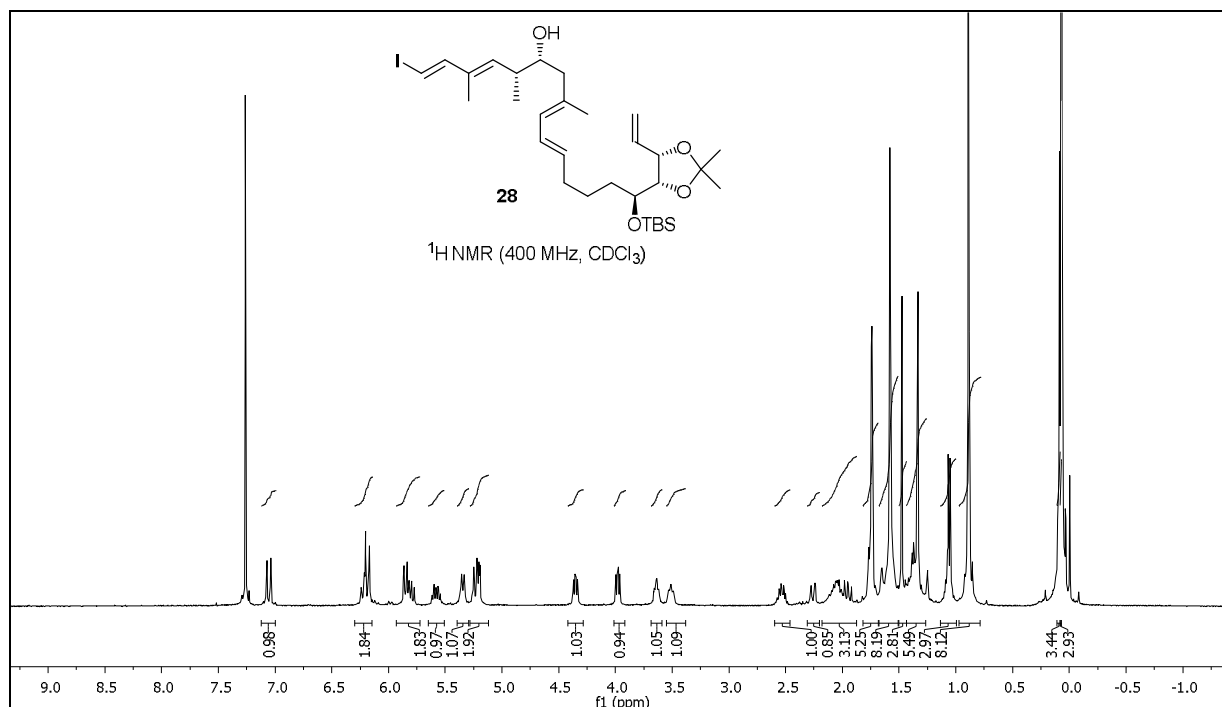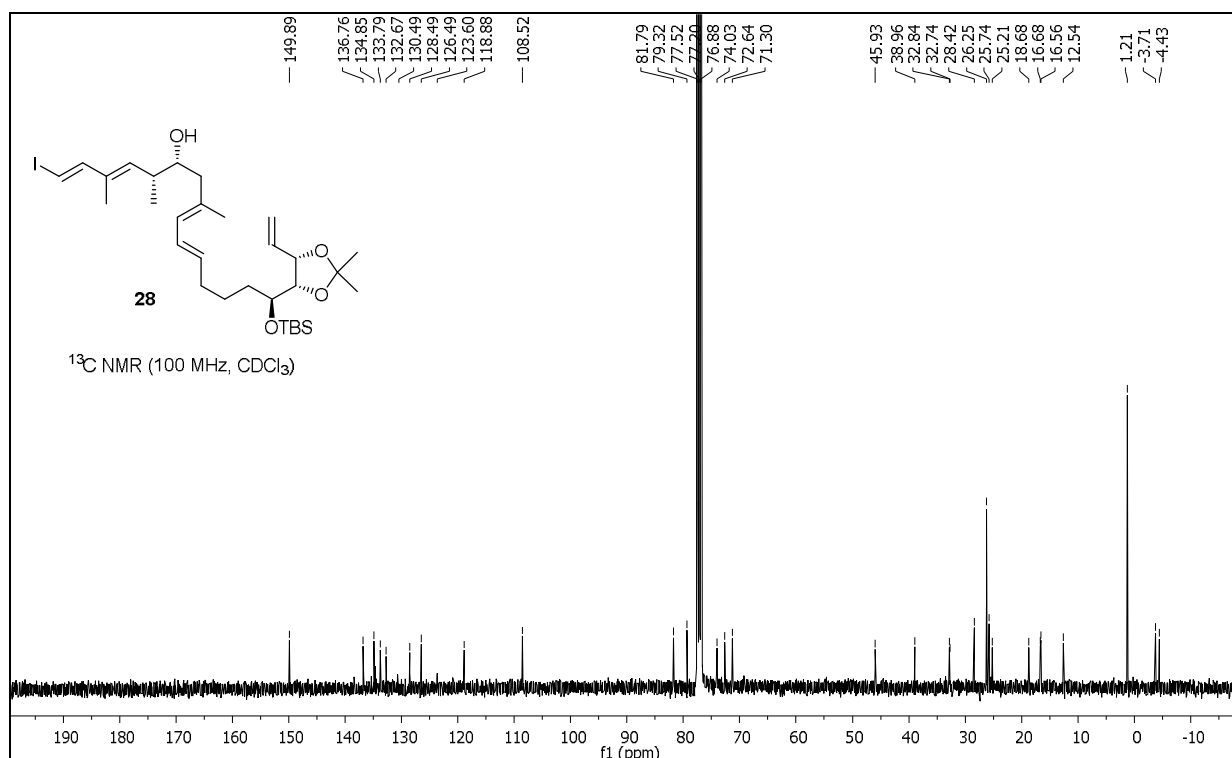

(6*E*,8*R*,9*R*,11*E*,13*E*,18*S*)-18-((4*S*,5*S*)-2,2-dimethyl-5-vinyl-1,3-dioxolan-4-yl)-2,2,6,8,11,20,20,21,21-nonamethyl-3,3-diphenyl-4,19-dioxo-3,20-disiladocosa-6,11,13-trien-9-ol (30)

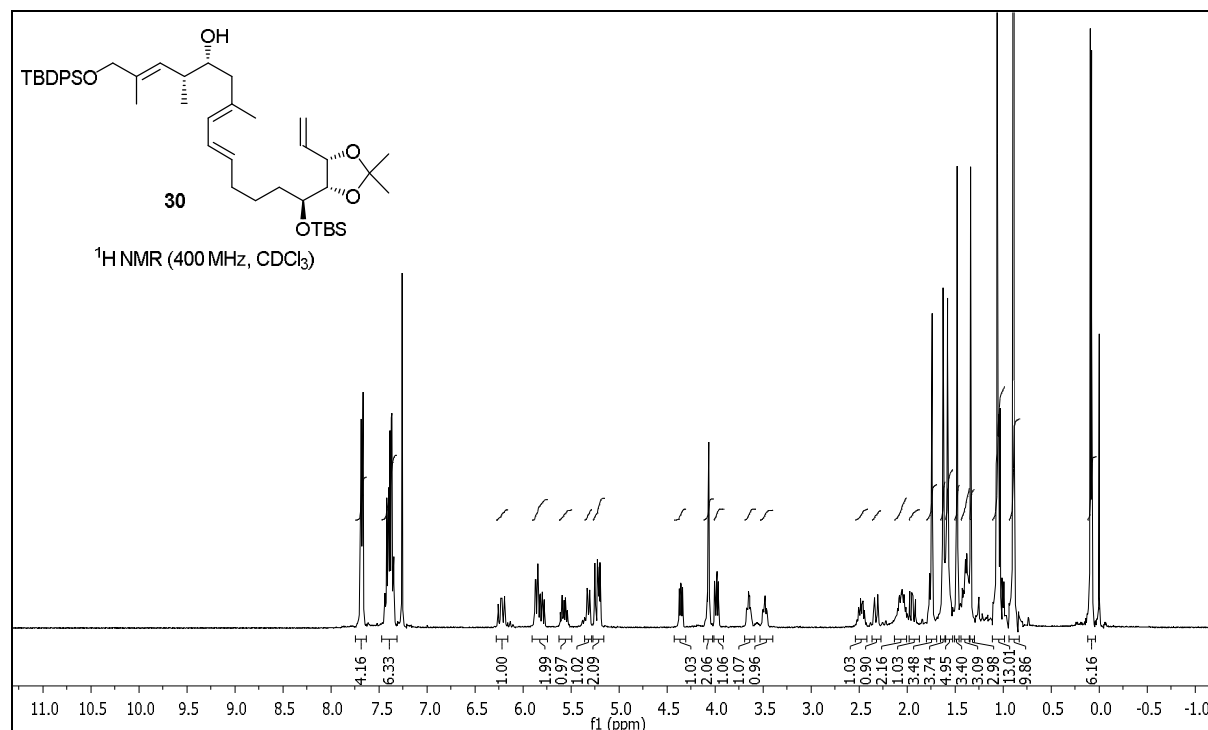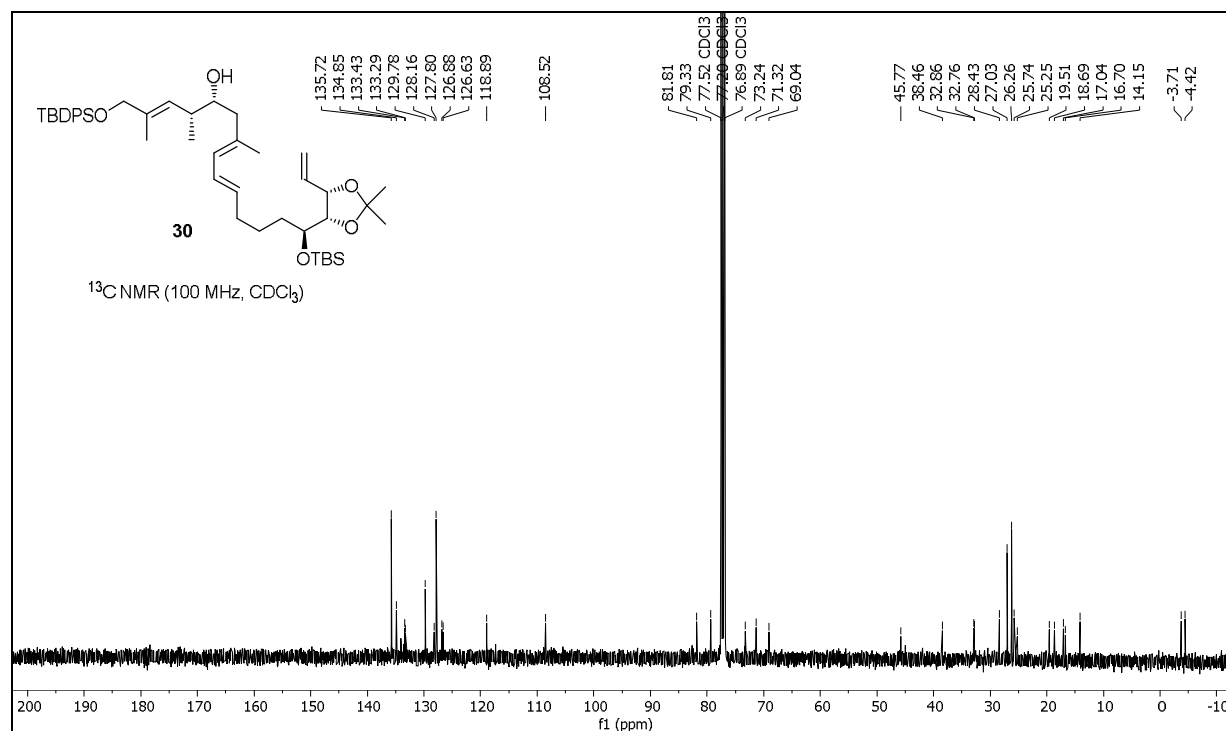

(*E*)-((6*E*,8*R*,9*R*,11*E*,13*E*,18*S*)-18-((4*S*,5*S*)-2,2-dimethyl-5-vinyl-1,3-dioxolan-4-yl)-2,2,6,8,11,20,20,21,21-nonamethyl-3,3-diphenyl-4,19-dioxo-3,20-disiladocosa-6,11,13-trien-9-yl)hepta-2,6-dienoate (**31**)

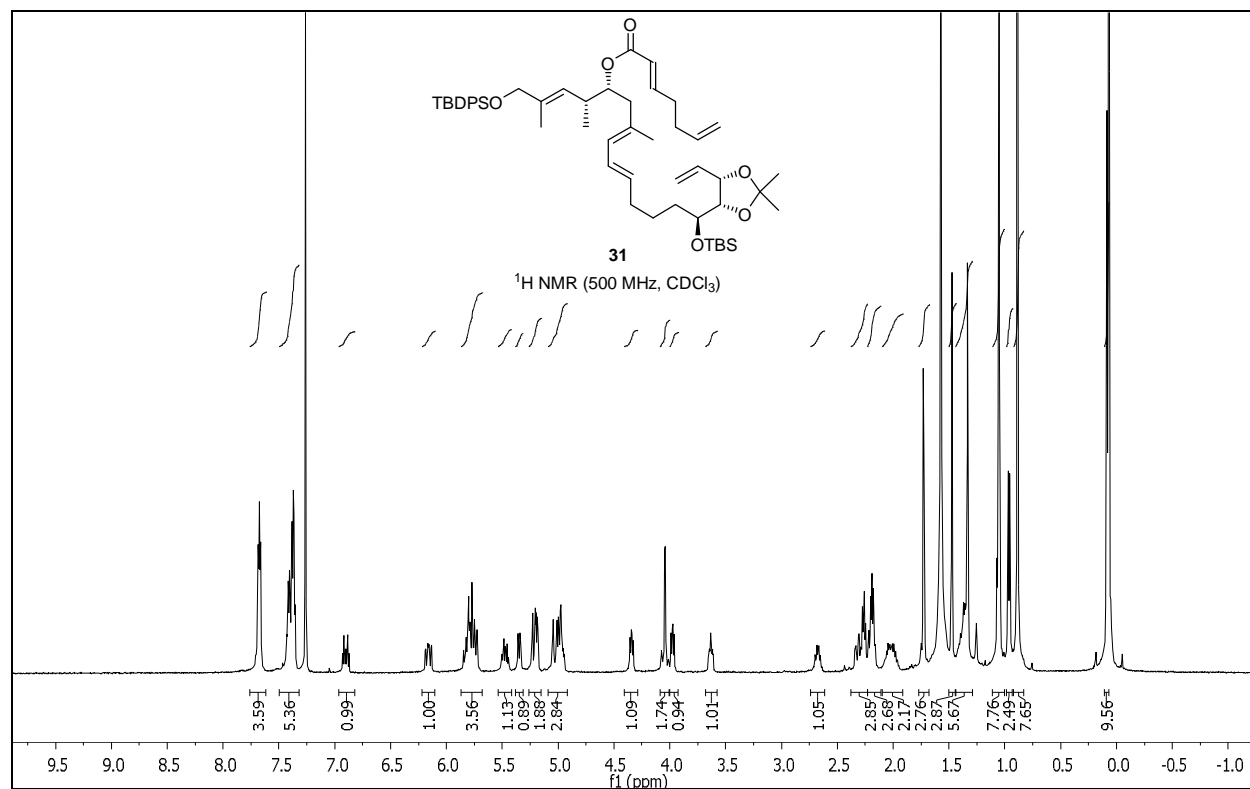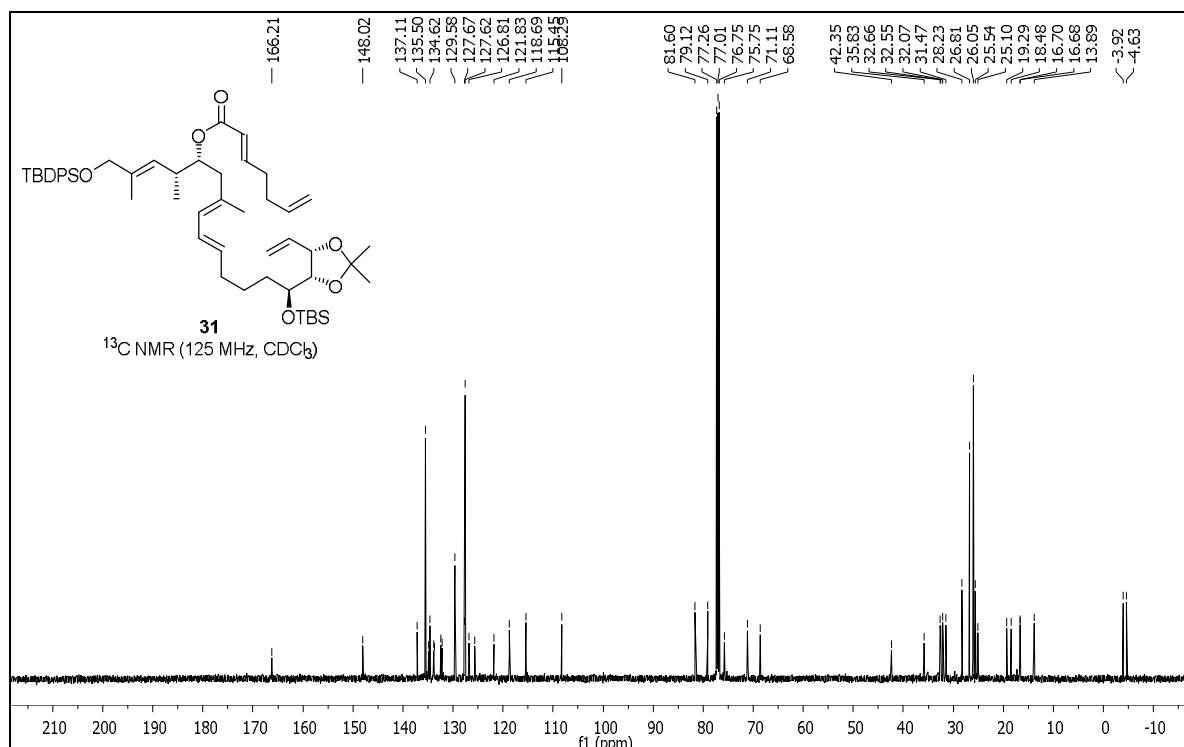

(E)-((2E,4R,5R,7E,9E,14S)-14-(tert-butyldimethylsilyloxy)-14-((4S,5S)-2,2-dimethyl-5-vinyl-1,3-dioxolan-4-yl)-1-hydroxy-2,4,7-trimethyltetradeca-2,7,9-trien-5-yl) hepta-2,6-dienoate (33)

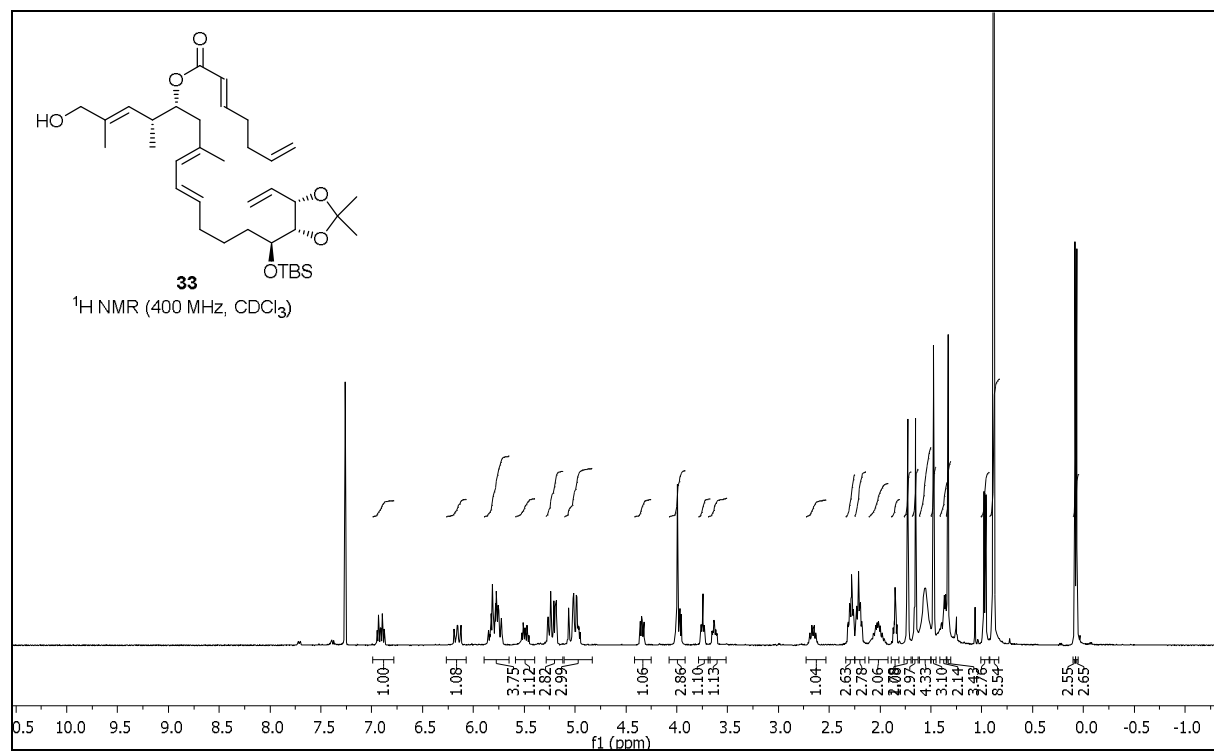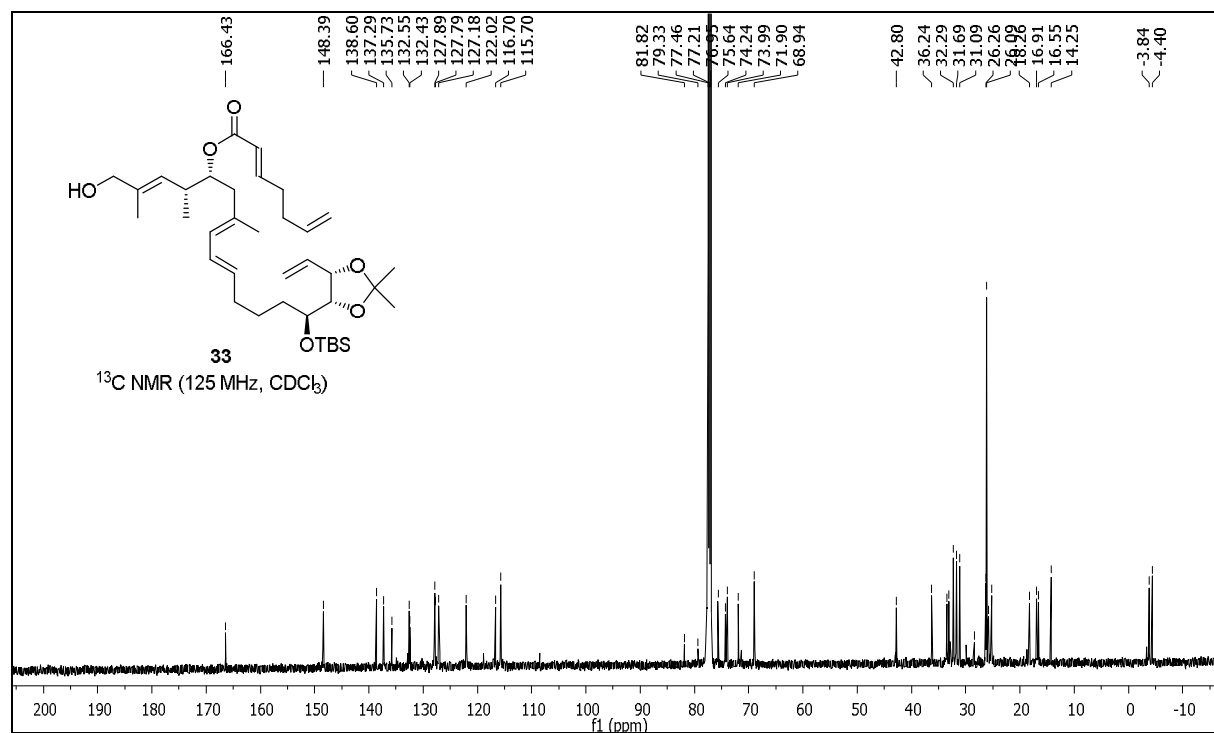

(*E*)-((1*E*,3*E*,5*R*,6*R*,8*E*,10*E*,15*S*)-15-((4*R*,5*S*)-2,2-dimethyl-5-vinyl-1,3-dioxolan-4-yl)-15-hydroxy-1-iodo-3,5,8-trimethylpentadeca-1,3,8,10-tetraen-6-yl) hepta-2,6-dienoate (**5b**)

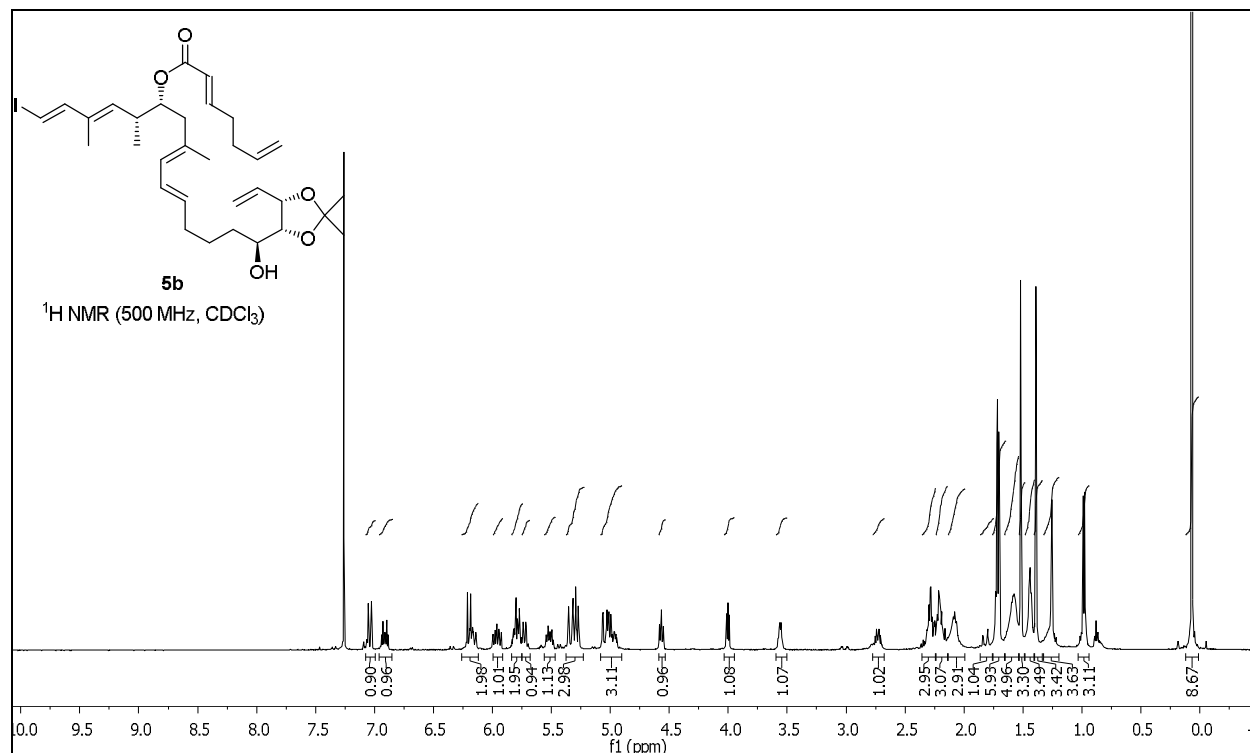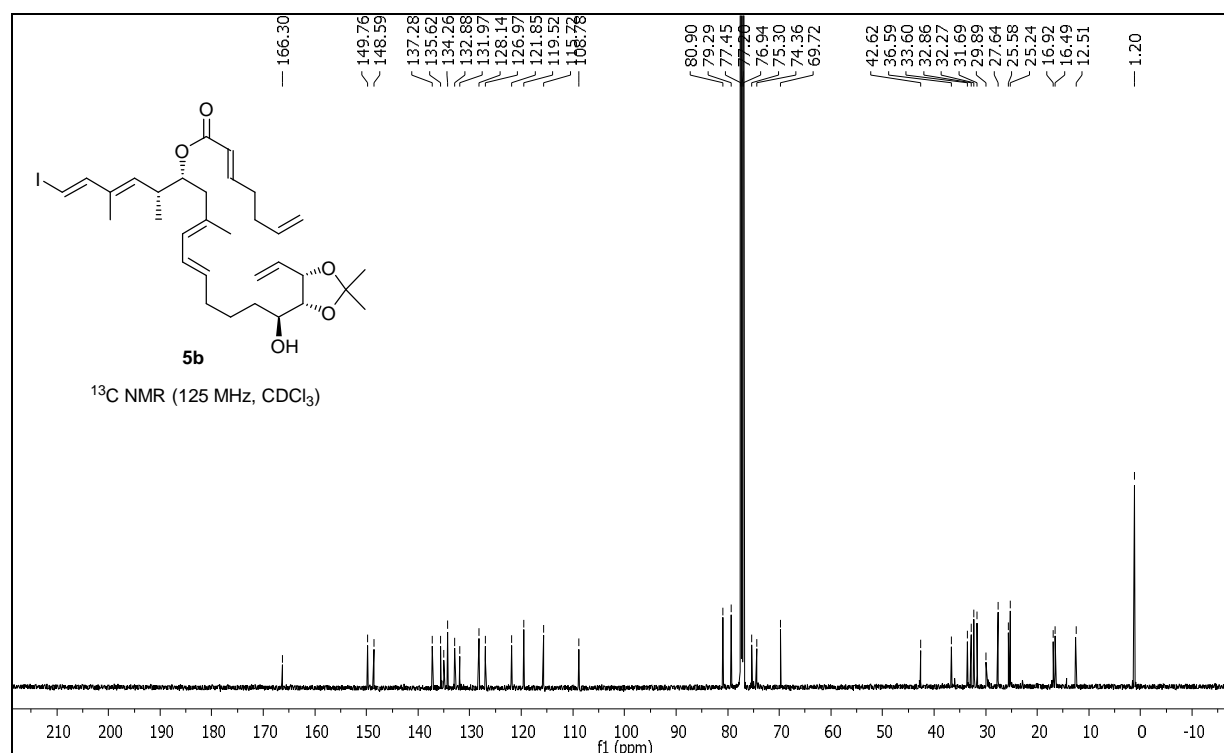

(6*E*,8*R*,9*R*,11*E*,13*E*,18*R*)-18-((4*S*,5*S*)-2,2-dimethyl-5-vinyl-1,3-dioxolan-4-yl)-2,2,6,8,11,20,20,21,21-nonamethyl-3,3-diphenyl-4,19-dioxo-3,20-disiladocosa-6,11,13-trien-9-yl acetate (**34**)

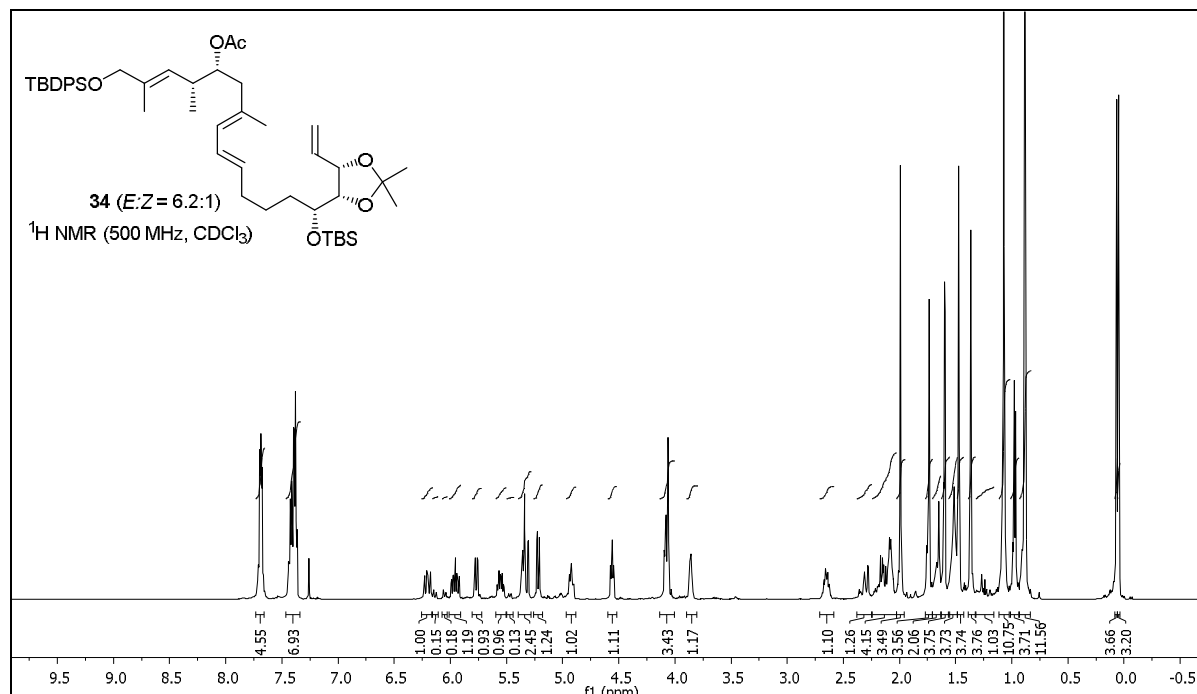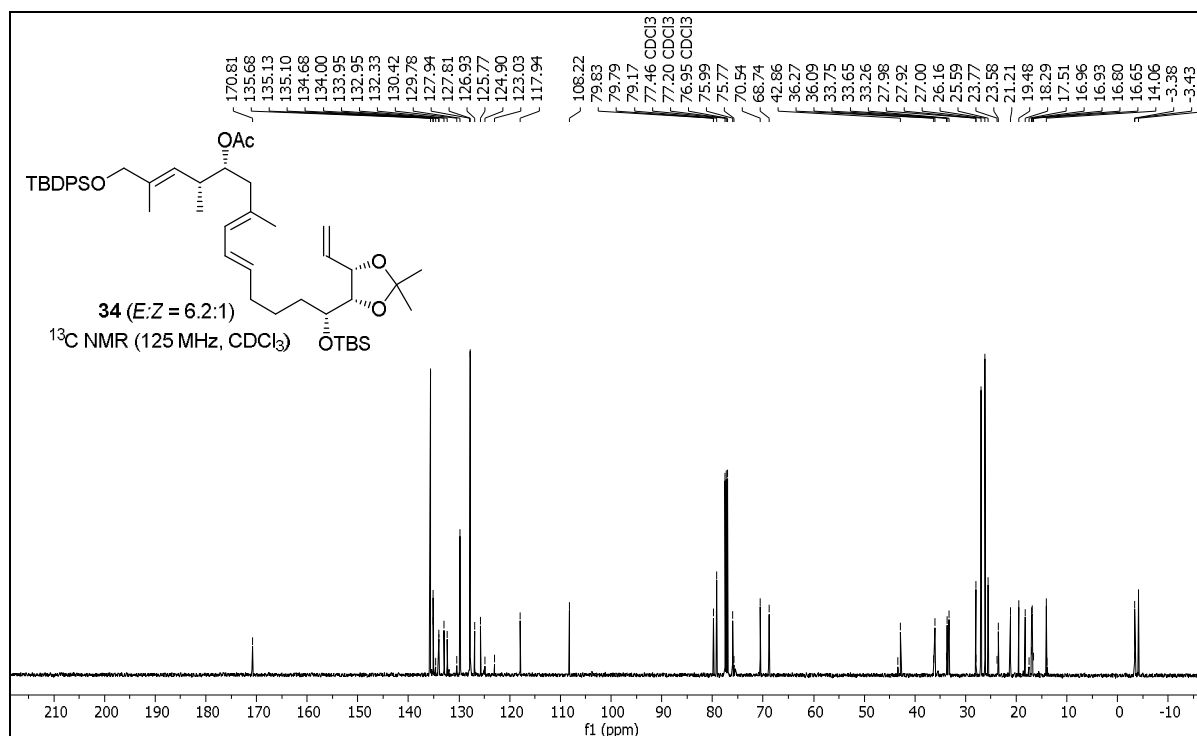



(6*E*,8*R*,9*R*,11*E*,13*E*,18*R*)-18-((4*S*,5*S*)-2,2-dimethyl-5-vinyl-1,3-dioxolan-4-yl)-2,2,6,8,11,20,20,21,21-nonamethyl-3,3-diphenyl-4,19-dioxo-3,20-disiladocosa-6,11,13-trien-9-ol (35)

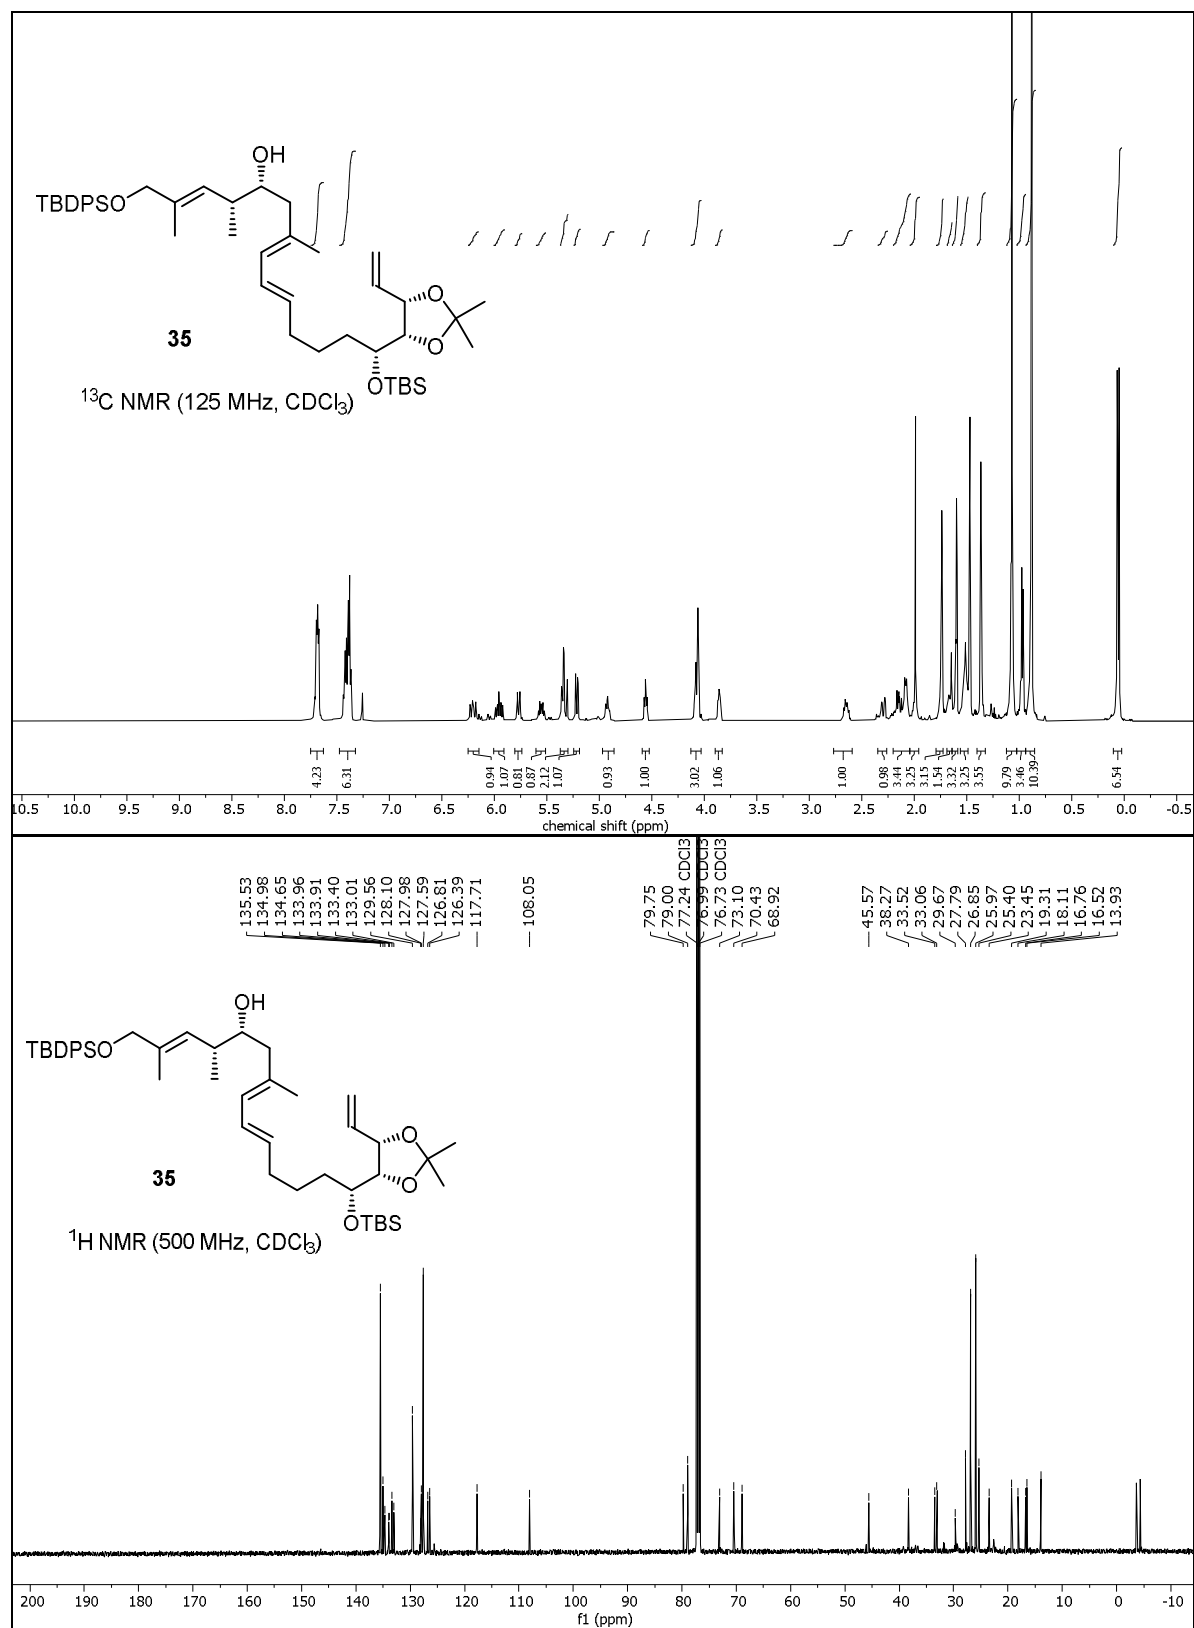

(*E*)-((6*E*,8*R*,9*R*,11*E*,13*E*,18*R*)-18-((4*S*,5*S*)-2,2-dimethyl-5-vinyl-1,3-dioxolan-4-yl)-2,2,6,8,11,20,20,21,21-nonamethyl-3,3-diphenyl-4,19-dioxo-3,20-disiladocosa-6,11,13-trien-9-yl) hepta-2,6-dienoate (36)

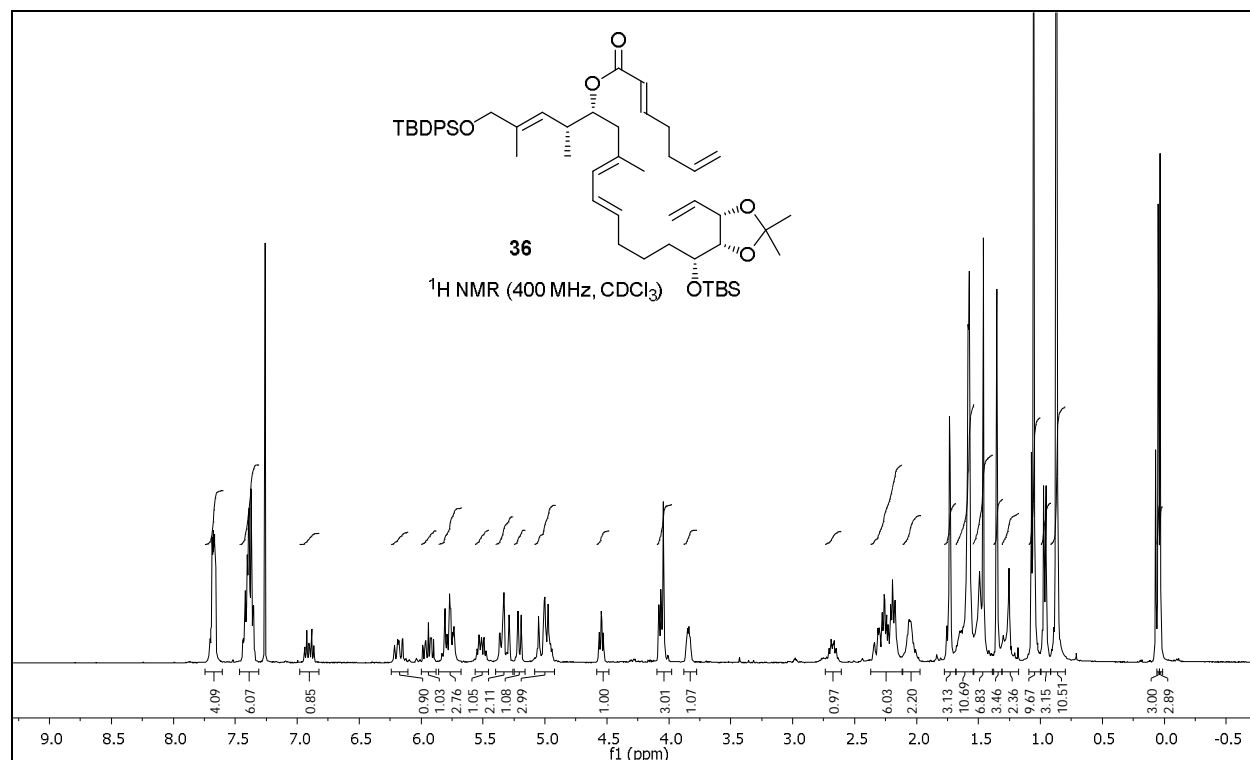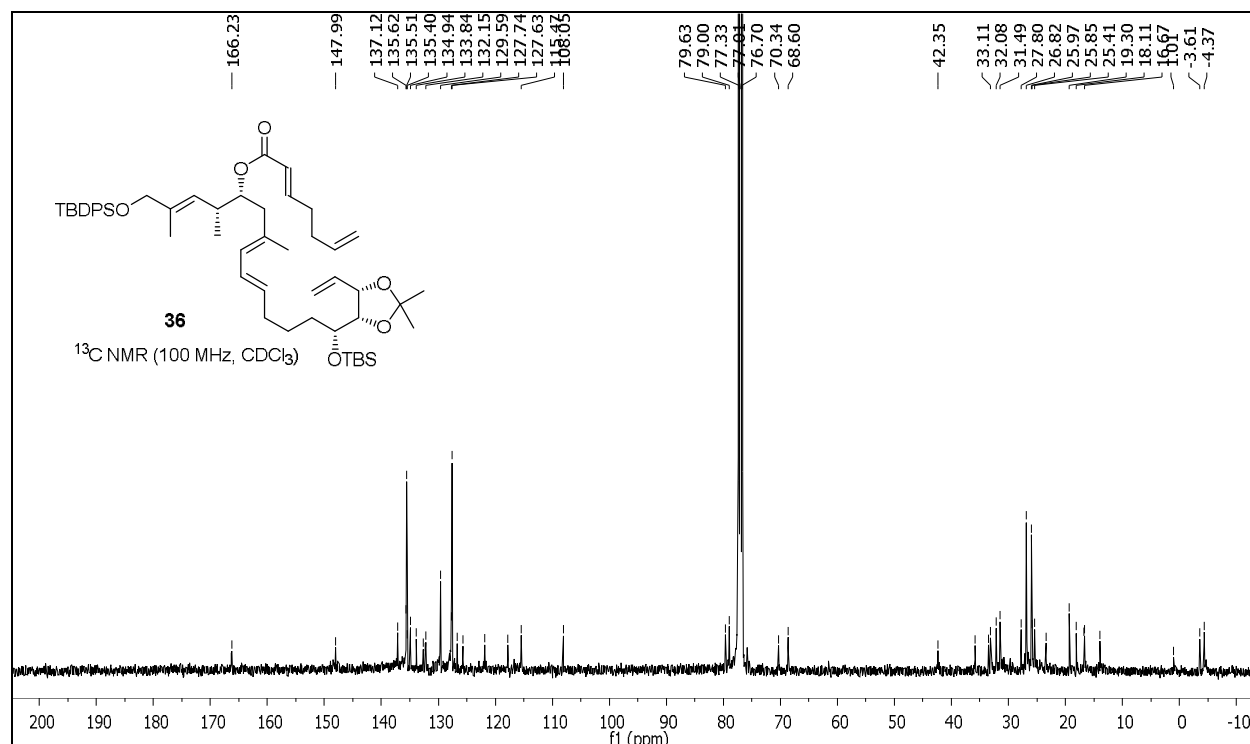

(*E*)-((1*E*,3*E*,5*R*,6*R*,8*E*,10*E*,15*R*)-15-(tert-butylidimethylsilyloxy)-15-((4*S*,5*S*)-2,2-dimethyl-5-vinyl-1,3-dioxolan-4-yl)-1-iodo-3,5,8-trimethylpentadeca-1,3,8,10-tetraen-6-yl) hepta-2,6-dienoate (**37**)

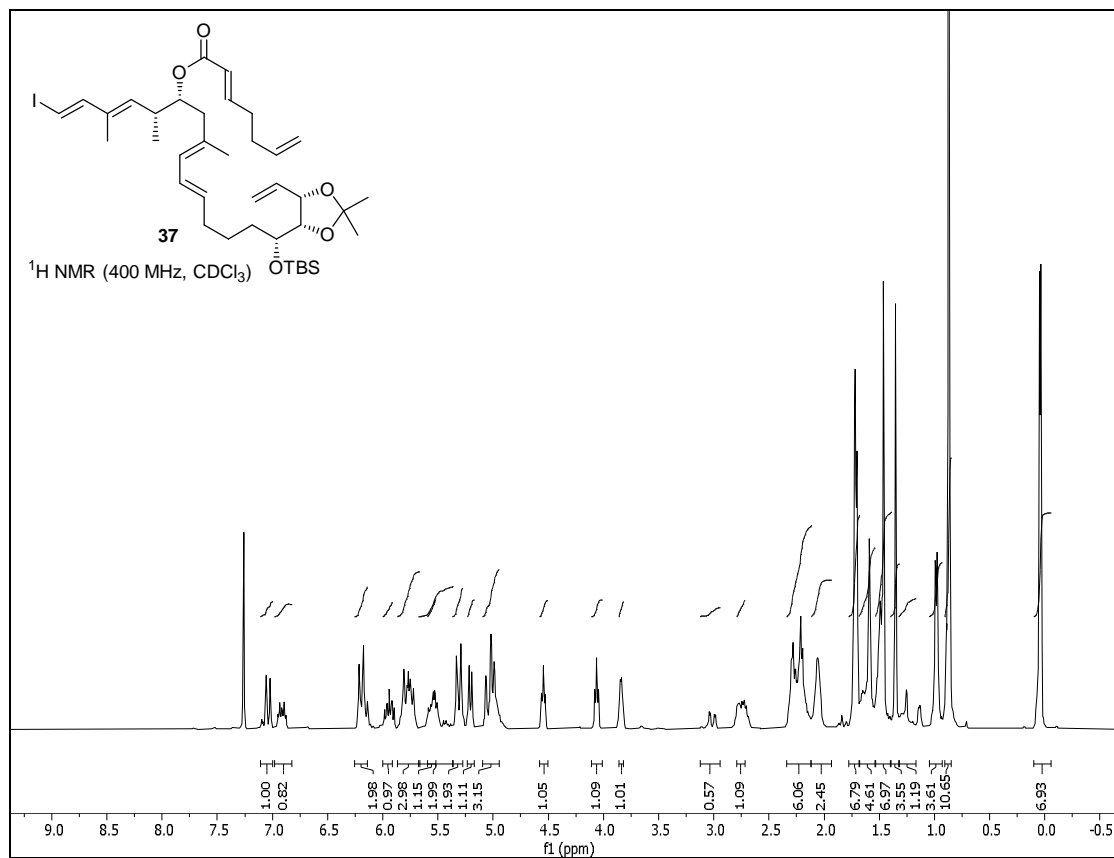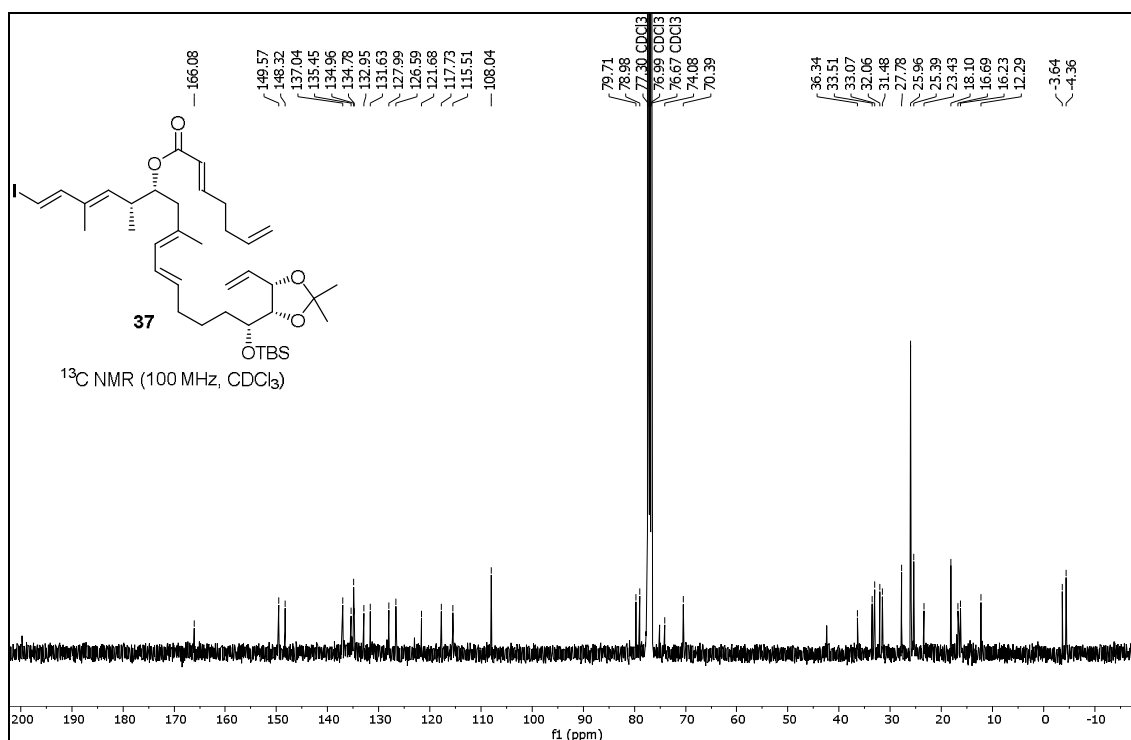

(*E*)-((1*E*,3*E*,5*R*,6*R*,8*E*,10*E*,15*R*)-15-((4*R*,5*S*)-2,2-dimethyl-5-vinyl-1,3-dioxolan-4-yl)-15-hydroxy-1-iodo-3,5,8-trimethylpentadeca-1,3,8,10-tetraen-6-yl) hepta-2,6-dienoate (**5a**)

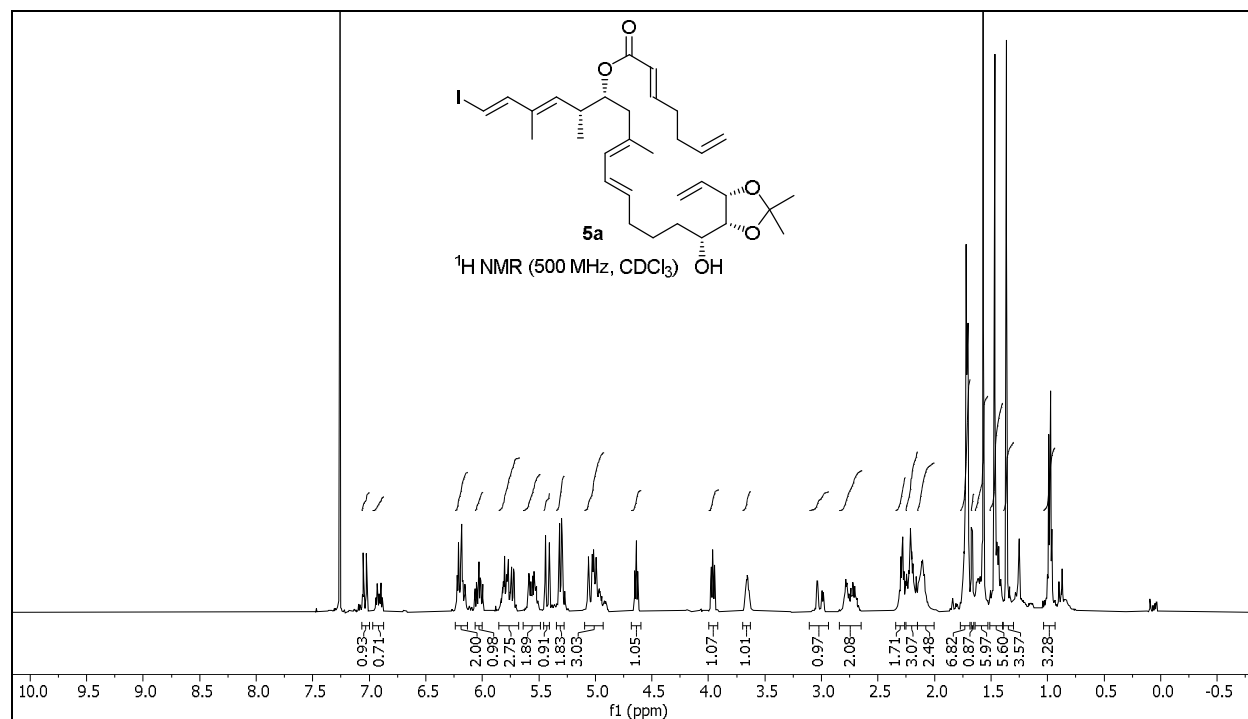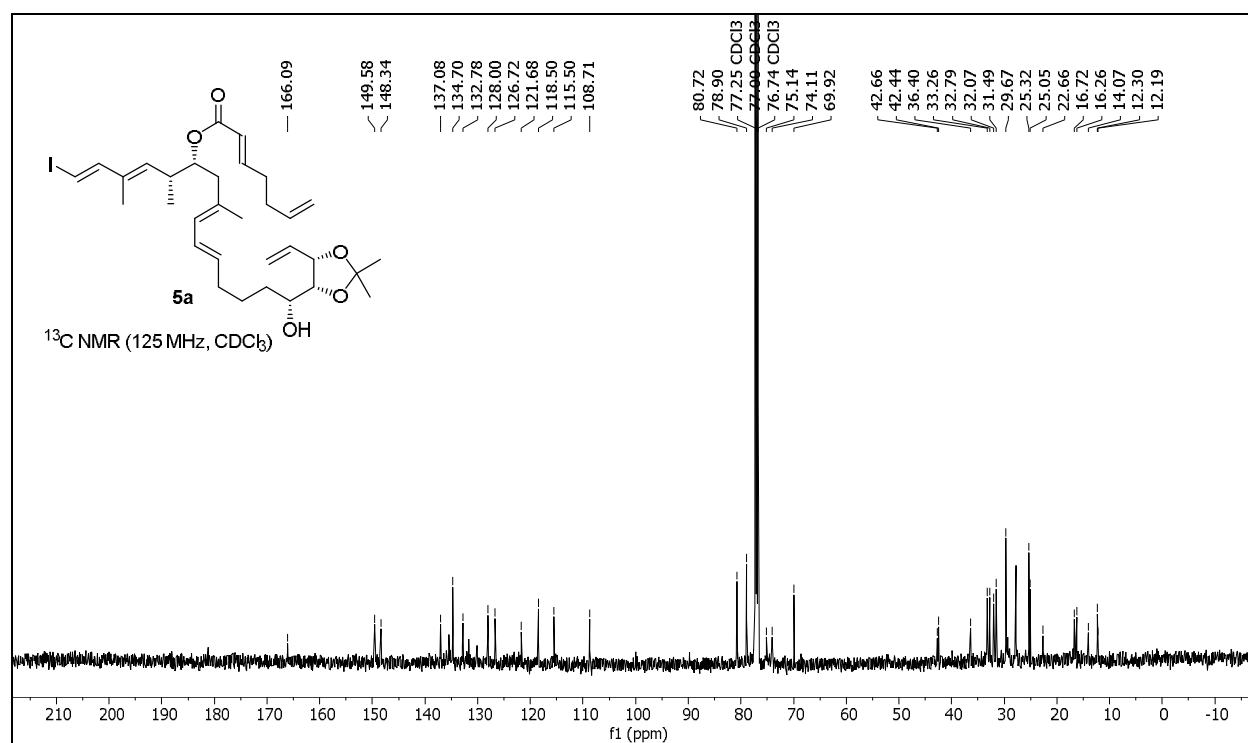

Supplement: d0ob01140a1.pdf [file d0ob01140a1.pdf]
